# Supplementary material for: Presence of Differences in the Radiofrequency Parameters Applied to Complex Pressure Ulcers: A Secondary Analysis
Source: MDPI journal article supplement (doi:10.3390/medicina59030516), 2023-03-07
Supplement: s1 [file s1]

Supplementary Material

Supplementary material. Table 1: Subjective perception and radiofrequency parameters model coefficient terms results.

|             | Global Response<br>Assesment                                      | Patients<br>satisfaction                                             | Professional<br>satisfaction                                          | Right frequency (Hz)                                              | Right maximum<br>power (Watts)                                   | Right average power<br>(Watts)                                | Right absorbed<br>energy (Volt-ampere)                          | Right temperatura<br>(Celsius)                                     | Left frequency (Hz)                                            | Left maximum power<br>(Watts)                                  | Left average power<br>(Watts)                                  | Left absorbed energy<br>(Volt-ampere)                            | Left temperatura<br>(Celsius)                                       |
|-------------|-------------------------------------------------------------------|----------------------------------------------------------------------|-----------------------------------------------------------------------|-------------------------------------------------------------------|------------------------------------------------------------------|---------------------------------------------------------------|-----------------------------------------------------------------|--------------------------------------------------------------------|----------------------------------------------------------------|----------------------------------------------------------------|----------------------------------------------------------------|------------------------------------------------------------------|---------------------------------------------------------------------|
| (Intercept) | 3.889 (SE=0.093)<br>95%CI(3.686, 4.101),<br>t=41.929, p=<0.001    | 9.333 (SE=0.085)<br>95%CI(9.174, 9.52),<br>t=110.146, p=<0.001       | 9.381 (SE=0.068)<br>95%CI(9.201, 9.517),<br>t=138.772, p=<0.001       | 2.448 (SE=0.208)<br>95%CI(1.95, 2.944),<br>t=11.773, p=<0.001     | 11.081 (SE=0.986)<br>95%CI(9.239, 12.845),<br>t=11.241, p=<0.001 | 8.05 (SE=0.503)<br>95%CI(7.137, 8.86),<br>t=15.997, p=<0.001  | 8.214 (SE=0.622)<br>95%CI(7.254, 9.448),<br>t=13.199, p=<0.001  | 33.762 (SE=0.306)<br>95%CI(33.048, 34.529),<br>t=110.276, p=<0.001 | 1.06 (SE=0.024)<br>95%CI(1.022, 1.116),<br>t=44.749, p=<0.001  | 11.9 (SE=1.783)<br>95%CI(8.43, 15.497),<br>t=6.675, p=<0.001   | 8.39 (SE=0.759)<br>95%CI(6.823, 9.818),<br>t=11.047, p=<0.001  | 11.4 (SE=0.73)<br>95%CI(9.954, 12.818),<br>t=15.615, p=<0.001    | 34.9 (SE=0.598)<br>95%CI(33.656, 36.039),<br>t=58.356, p=<0.001     |
| T2          | -0.028 (SE=0.1) 95%CI(-<br>0.194, 0.189), t=-0.277,<br>p=0.782    | -0.19 (SE=0.094)<br>95%CI(-0.372, -<br>0.022), t=-2.03,<br>p=0.043   | -0.31 (SE=0.075)<br>95%CI(-0.478, -<br>0.131), t=-4.145,<br>p=<0.001  | -1.286 (SE=0.294)<br>95%CI(-2.034, -0.585),<br>t=-4.373, p=<0.001 | 2.064 (SE=1.13)<br>95%CI(-0.129, 4.309),<br>t=1.826, p=0.069     | 0.105 (SE=0.641)<br>95%CI(-1.098, 1.26),<br>t=0.163, p=0.87   | 0.186 (SE=0.714)<br>95%CI(-1.085, 2.001),<br>t=0.26, p=0.795    | 1.31 (SE=0.4)<br>95%CI(0.362, 2.199),<br>t=3.271, p=0.001          | -0.02 (SE=0.025)<br>95%CI(-0.072, 0.025),<br>t=-0.792, p=0.431 | 7.6 (SE=2.316)<br>95%CI(3.465, 11.68),<br>t=3.282, p=0.002     | 1.91 (SE=1.04) 95%CI(-<br>0.47, 3.684), t=1.837,<br>p=0.07     | -1.6 (SE=1.032) 95%CI(-<br>3.677, 0.578), t=-1.55,<br>p=0.125    | -4.2 (SE=0.725)<br>95%CI(-5.653, -<br>2.985), t=-5.793,<br>p=<0.001 |
| T3          | -0.25 (SE=0.1) 95%CI(-<br>0.453, -0.062), t=-2.493,<br>p=0.013    | 0 (SE=0.094)<br>95%CI(-0.188, -<br>0.204), t=0, p=>0.999             | -0.333 (SE=0.075)<br>95%CI(-0.496, -<br>0.177), t=-4.464,<br>p=<0.001 | -1.271 (SE=0.294)<br>95%CI(-1.951, -0.635),<br>t=-4.324, p=<0.001 | 4.014 (SE=1.13)<br>95%CI(1.728, 6.187),<br>t=3.551, p=<0.001     | 1.902 (SE=0.641)<br>95%CI(0.619, 3.351),<br>t=2.969, p=0.003  | 2.857 (SE=0.714)<br>95%CI(1.554, 4.335),<br>t=4.003, p=<0.001   | 3.5 (SE=0.4)<br>95%CI(2.665, 4.366),<br>t=8.741, p=<0.001          | 0.14 (SE=0.025)<br>95%CI(0.09, 0.196),<br>t=5.546, p=<0.001    | 6.1 (SE=2.316)<br>95%CI(1.744, 11.061),<br>t=2.634, p=0.01     | 1.41 (SE=1.04) 95%CI(-<br>0.479, 3.991), t=1.356,<br>p=0.179   | 0.1 (SE=1.032) 95%CI(-<br>1.747, 2.207), t=0.097,<br>p=0.923     | 2.2 (SE=0.725)<br>95%CI(0.779, 3.814),<br>t=3.034, p=0.003          |
| T4          | -0.75 (SE=0.1) 95%CI(-<br>0.961, -0.543), t=-7.478,<br>p=<0.001   | -0.119 (SE=0.094)<br>95%CI(-0.313, 0.1),<br>t=-1.269, p=0.205        | -0.286 (SE=0.075)<br>95%CI(-0.47, -0.122),<br>t=-3.826, p=<0.001      | -1.31 (SE=0.294)<br>95%CI(-1.911, -0.587),<br>t=-4.454, p=<0.001  | 9.133 (SE=1.13)<br>95%CI(6.907, 11.411),<br>t=8.08, p=<0.001     | 3.379 (SE=0.641)<br>95%CI(2.361, 4.853),<br>t=5.273, p=<0.001 | 2.279 (SE=0.714)<br>95%CI(0.928, 3.753),<br>t=3.193, p=0.002    | 2.024 (SE=0.4)<br>95%CI(1.107, 2.836),<br>t=5.055, p=<0.001        | 0 (SE=0.025) 95%CI(-<br>0.06, 0.06), t=0,<br>p=>0.999          | 21.2 (SE=2.316)<br>95%CI(16.2, 24.986),<br>t=9.156, p=<0.001   | 3.81 (SE=1.04)<br>95%CI(1.831, 6.278),<br>t=3.664, p=<0.001    | 0.8 (SE=1.032) 95%CI(-<br>1.158, 3.466), t=0.775,<br>p=0.441     | -2.9 (SE=0.725)<br>95%CI(-4.648, -<br>1.355), t=-4,<br>p=<0.001     |
| T5          | -1.111 (SE=0.1) 95%CI(-<br>1.322, -0.938), t=-11.079,<br>p=<0.001 | -0.167 (SE=0.094)<br>95%CI(-0.389, -<br>0.032), t=-1.777,<br>p=0.076 | -0.333 (SE=0.075)<br>95%CI(-0.479, -0.17),<br>t=-4.464, p=<0.001      | -1.281 (SE=0.294)<br>95%CI(-2.003, -0.74),<br>t=-4.357, p=<0.001  | 2.443 (SE=1.13)<br>95%CI(0.292, 4.673),<br>t=2.161, p=0.031      | 1.26 (SE=0.641)<br>95%CI(0.035, 2.597),<br>t=1.966, p=0.05    | -1.252 (SE=0.714)<br>95%CI(-2.752, 0.341),<br>t=-1.755, p=0.08  | 3.262 (SE=0.4)<br>95%CI(2.402, 4.079),<br>t=8.147, p=<0.001        | 0 (SE=0.025) 95%CI(-<br>0.063, 0.052), t=0,<br>p=>0.999        | -2.2 (SE=2.316)<br>95%CI(-6.875, 2.953),<br>t=-0.95, p=0.345   | -2.79 (SE=1.04)<br>95%CI(-4.893, -1.109),<br>t=-2.683, p=0.009 | -6.7 (SE=1.032) 95%CI(-<br>8.859, -4.345), t=-6.489,<br>p=<0.001 | 2 (SE=0.725)<br>95%CI(0.349, 3.492),<br>t=2.759, p=0.007            |
| T6          | -1.583 (SE=0.1) 95%CI(-<br>1.784, -1.379), t=-15.787,<br>p=<0.001 | -0.119 (SE=0.094)<br>95%CI(-0.31, 0.062),<br>t=-1.269, p=0.205       | -0.262 (SE=0.075)<br>95%CI(-0.444, -<br>0.119), t=-3.507,<br>p=0.001  | -0.771 (SE=0.294)<br>95%CI(-1.522, -0.137),<br>t=-2.624, p=0.009  | 4.157 (SE=1.13)<br>95%CI(2.497, 6.238),<br>t=3.677, p=<0.001     | 1.974 (SE=0.641)<br>95%CI(1.011, 3.53),<br>t=3.08, p=0.002    | 1.238 (SE=0.714)<br>95%CI(-0.216, 2.949),<br>t=1.735, p=0.084   | 3.405 (SE=0.4)<br>95%CI(2.496, 4.218),<br>t=8.504, p=<0.001        | 0.14 (SE=0.025)<br>95%CI(0.079, 0.19),<br>t=5.546, p=<0.001    | 1.4 (SE=2.316) 95%CI(-<br>2.831, 5.088), t=0.605,<br>p=0.547   | 1.51 (SE=1.04) 95%CI(-<br>1.14, 3.586), t=1.452,<br>p=0.15     | 1.4 (SE=1.032) 95%CI(-<br>0.246, 3.379), t=1.356,<br>p=0.179     | 2.8 (SE=0.725)<br>95%CI(1.178, 4.313),<br>t=3.862, p=<0.001         |
| T7          | -1.917 (SE=0.1) 95%CI(-<br>2.102, -1.7), t=-19.111,<br>p=<0.001   | -0.119 (SE=0.094)<br>95%CI(-0.334, -<br>0.044), t=-1.269,<br>p=0.205 | -0.167 (SE=0.075)<br>95%CI(-0.303, -<br>0.018), t=-2.232,<br>p=0.026  | -1.257 (SE=0.294)<br>95%CI(-1.884, -0.573),<br>t=-4.276, p=<0.001 | 5.967 (SE=1.13)<br>95%CI(3.623, 8.631),<br>t=5.278, p=<0.001     | 0.331 (SE=0.641)<br>95%CI(-0.938, 1.7),<br>t=0.516, p=0.606   | -0.483 (SE=0.714)<br>95%CI(-2.377, 0.825),<br>t=-0.677, p=0.499 | 2.071 (SE=0.4)<br>95%CI(1.29, 2.86),<br>t=5.174, p=<0.001          | 0.14 (SE=0.025)<br>95%CI(0.072, 0.197),<br>t=5.546, p=<0.001   | 12.8 (SE=2.316)<br>95%CI(8.367, 17.586),<br>t=5.528, p=<0.001  | 2.31 (SE=1.04)<br>95%CI(0.215, 4.379),<br>t=2.221, p=0.029     | 0.5 (SE=1.032) 95%CI(-<br>1.232, 2.704), t=0.484,<br>p=0.629     | -2.8 (SE=0.725)<br>95%CI(-4.33, -0.863),<br>t=-3.862, p=<0.001      |
| T8          | -2.5 (SE=0.1) 95%CI(-<br>2.724, -2.306), t=-24.927,<br>p=<0.001   | 0 (SE=0.094)<br>95%CI(-0.194, -<br>0.176), t=0, p=>0.999             | -0.119 (SE=0.075)<br>95%CI(-0.265, -<br>0.071), t=-1.594,<br>p=0.112  | -1.281 (SE=0.294)<br>95%CI(-1.922, -0.561),<br>t=-4.357, p=<0.001 | 6.157 (SE=1.13)<br>95%CI(4.136, 8.058),<br>t=5.447, p=<0.001     | 0.429 (SE=0.641)<br>95%CI(-0.517, 1.99),<br>t=0.669, p=0.504  | 0.262 (SE=0.714)<br>95%CI(-1.303, 1.849),<br>t=0.367, p=0.714   | 3.071 (SE=0.4)<br>95%CI(2.114, 3.999),<br>t=7.671, p=<0.001        | 0.11 (SE=0.025)<br>95%CI(0.044, 0.179),<br>t=4.357, p=<0.001   | 15.3 (SE=2.316)<br>95%CI(11.535, 20.914),<br>t=6.608, p=<0.001 | 0.21 (SE=1.04) 95%CI(-<br>1.643, 2.965), t=0.202,<br>p=0.84    | -1.5 (SE=1.032) 95%CI(-<br>3.163, 0.53), t=-1.453,<br>p=0.15     | 1.4 (SE=0.725)<br>95%CI(-0.022, -<br>2.977), t=-1.931,<br>p=0.057   |
| T9          | -2.778 (SE=0.1) 95%CI(-<br>2.984, -2.576), t=-27.696,<br>p=<0.001 | 0 (SE=0.094)<br>95%CI(-0.183, 0.16),<br>t=0, p=>0.999                | -0.048 (SE=0.075)<br>95%CI(-0.186, -<br>0.094), t=-0.638,<br>p=0.524  | -1.31 (SE=0.294)<br>95%CI(-1.967, -0.658),<br>t=-4.454, p=<0.001  | 6.705 (SE=1.13)<br>95%CI(4.863, 8.858),<br>t=5.931, p=<0.001     | 2.783 (SE=0.641)<br>95%CI(1.482, 4.187),<br>t=4.344, p=<0.001 | 1.7 (SE=0.714)<br>95%CI(0.184, 3.531),<br>t=2.382, p=0.018      | 3.238 (SE=0.4)<br>95%CI(2.466, 4.13),<br>t=8.087, p=<0.001         | 0 (SE=0.025) 95%CI(-<br>0.057, 0.055), t=0,<br>p=>0.999        | 11.4 (SE=2.316)<br>95%CI(7.999, 16.068),<br>t=4.923, p=<0.001  | 5.61 (SE=1.04)<br>95%CI(3.321, 7.882),<br>t=5.395, p=<0.001    | 6.4 (SE=1.032)<br>95%CI(4.46, 8.726),<br>t=6.199, p=<0.001       | 2.1 (SE=0.725)<br>95%CI(0.439, 3.734),<br>t=2.896, p=0.005          |
| T10         | -2.861 (SE=0.1) 95%CI(-<br>3.08, -2.667), t=-28.527,<br>p=<0.001  | -0.071 (SE=0.094)<br>95%CI(-0.3, 0.103),<br>t=-0.761, p=0.447        | -0.024 (SE=0.075)<br>95%CI(-0.188, -<br>0.138), t=-0.319,<br>p=0.75   | -1.314 (SE=0.294)<br>95%CI(-1.94, -0.932),<br>t=-4.47, p=<0.001   | 6.752 (SE=1.13)<br>95%CI(4.643, 8.932),<br>t=5.973, p=<0.001     | 2.117 (SE=0.641)<br>95%CI(0.94, 3.572),<br>t=3.303, p=0.001   | 1.952 (SE=0.714)<br>95%CI(0.453, 3.179),<br>t=2.735, p=0.007    | 3.238 (SE=0.4)<br>95%CI(2.196, 4.177),<br>t=8.087, p=<0.001        | 0 (SE=0.025) 95%CI(-<br>0.065, 0.058), t=0,<br>p=>0.999        | 13.6 (SE=2.316)<br>95%CI(8.811, 18.472),<br>t=5.873, p=<0.001  | 6.31 (SE=1.04)<br>95%CI(3.658, 8.961),<br>t=6.068, p=<0.001    | 6.1 (SE=1.032)<br>95%CI(4.143, 8.421),<br>t=5.908, p=<0.001      | 2.1 (SE=0.725)<br>95%CI(0.449, 3.469),<br>t=2.896, p=0.005          |

(SE): model coefficient (standard error); 95%CI: 95% confidence interval; t: Significant if p<0.05 (shown in red).

**Supplementary material.** Table 2: Subjective perception and radiofrequency parameters outcomes.

|                                     | T1         | T2         | T3         | T4          | T5         | T6         | T7         | T8         | T9         | T10        |
|-------------------------------------|------------|------------|------------|-------------|------------|------------|------------|------------|------------|------------|
| Global Response Assesment           | 3.89±0.32  | 3.86±0.35  | 3.64±0.68  | 3.14±0.76   | 2.78±0.64  | 2.31±0.67  | 1.97±0.74  | 1.39±0.55  | 1.11±0.32  | 1.03±0.17  |
| Patients satisfaction               | 9.33±0.69  | 9.14±0.47  | 9.33±0.57  | 9.21±0.52   | 9.17±0.49  | 9.21±0.52  | 9.21±0.52  | 9.33±0.57  | 9.33±0.57  | 9.26±0.54  |
| Professional satisfaction           | 9.38±0.54  | 9.07±0.51  | 9.05±0.49  | 9.10±0.37   | 9.05±0.22  | 9.12±0.33  | 9.21±0.42  | 9.26±0.45  | 9.33±0.48  | 9.36±0.48  |
| Right frequency (Hz)                | 2.45±3.55  | 1.15±0.08  | 1.16±0.07  | 1.12±0.09   | 1.15±0.07  | 1.66±2.34  | 1.18±0.04  | 1.15±0.07  | 1.12±0.09  | 1.12±0.10  |
| Right maximum power (Watts)         | 11.08±4.64 | 17.02±4.97 | 18.97±2.70 | 24.09±11.60 | 17.40±4.39 | 19.12±2.56 | 20.93±7.39 | 21.12±5.89 | 21.66±7.03 | 21.71±8.54 |
| Right average power (Watts)         | 8.05±3.97  | 12.23±3.48 | 14.03±1.62 | 15.51±6.28  | 13.39±2.73 | 14.10±2.38 | 12.46±2.51 | 12.56±3.74 | 14.91±4.22 | 14.24±3.94 |
| Right absorbed energy (Volt-ampere) | 8.21±4.11  | 15.60±4.82 | 18.27±3.82 | 17.69±7.01  | 14.16±3.76 | 16.65±3.90 | 14.93±3.44 | 15.67±2.81 | 17.11±6.77 | 17.36±5.66 |
| Right temperatura (Celsius)         | 34.90±1.45 | 30.43±3.33 | 36.83±0.31 | 31.73±3.23  | 36.63±0.32 | 37.43±0.49 | 31.83±3.38 | 36.03±0.48 | 36.73±0.01 | 36.73±0.01 |
| Left frequency (Hz)                 | 1.06±0.10  | 1.03±0.08  | 1.19±0.00  | 1.05±0.10   | 1.05±0.10  | 1.19±0.00  | 1.19±0.00  | 1.16±0.05  | 1.05±0.10  | 1.05±0.10  |
| Left maximum power (Watts)          | 11.90±1.66 | 23.56±3.97 | 22.06±0.29 | 37.16±10.90 | 13.76±6.63 | 17.36±2.45 | 28.76±4.20 | 31.26±7.53 | 27.36±4.01 | 29.56±5.38 |
| Left average power (Watts)          | 8.39±2.66  | 14.60±1.49 | 14.10±1.03 | 16.50±1.61  | 9.90±4.69  | 14.20±1.02 | 15.00±2.20 | 12.90±3.07 | 18.30±2.39 | 19.00±3.48 |
| Left absorbed energy (Volt-ampere)  | 11.40±0.84 | 18.61±1.66 | 20.31±0.99 | 21.01±1.27  | 13.51±4.75 | 21.61±0.79 | 20.71±0.53 | 18.71±1.75 | 26.61±2.65 | 26.31±3.75 |
| Left temperatura (Celsius)          | 34.90±1.45 | 30.43±3.33 | 36.83±0.31 | 31.73±3.23  | 36.63±0.32 | 37.43±0.49 | 31.83±3.38 | 36.03±0.48 | 36.73±0.01 | 36.73±0.01 |

Data expressed as mean±standard deviation.

**Supplementary material. Table 3:** Subjective perception and radiofrequency parameters overall pairwise model coefficient terms results.

|        | Global Response Assessment                                      | Patients satisfaction                                            | Professional satisfaction                                        | Right frequency (Hz)                                             | Right maximum power (Watts)                                         | Right average power (Watts)                                         | Right absorbed energy (Volt-ampere)                                | Right temperatura (Celsius)                                        | Left frequency (Hz)                                            | Left maximum power (Watts)                                           | Left average power (Watts)                                         | Left absorbed energy (Volt-ampere)                                 | Left temperatura (Celsius)                                      |
|--------|-----------------------------------------------------------------|------------------------------------------------------------------|------------------------------------------------------------------|------------------------------------------------------------------|---------------------------------------------------------------------|---------------------------------------------------------------------|--------------------------------------------------------------------|--------------------------------------------------------------------|----------------------------------------------------------------|----------------------------------------------------------------------|--------------------------------------------------------------------|--------------------------------------------------------------------|-----------------------------------------------------------------|
| T1-T10 | 2.861 (SE=0.1)<br>95%CI(2.664, 3.058),<br>t=28.527,<br>p=<0.001 | 0.071 (SE=0.094)<br>95%CI(-0.113, 0.256),<br>t=0.761,<br>p=0.447 | 0.024 (SE=0.075)<br>95%CI(-0.123, 0.171),<br>t=0.319,<br>p=0.75  | 1.314 (SE=0.294)<br>95%CI(0.736, 1.892),<br>t=4.47,<br>p=<0.001  | -6.752 (SE=1.13)<br>95%CI(-8.975, -4.529),<br>t=-5.973,<br>p=<0.001 | -2.117 (SE=0.641)<br>95%CI(-3.377, -0.857), t=-3.303,<br>p=0.001    | -1.952 (SE=0.714)<br>95%CI(-3.356, -0.549), t=-2.735,<br>p=0.007   | -3.238 (SE=0.4)<br>95%CI(-4.025, -2.451),<br>t=-8.087,<br>p=<0.001 | 0 (SE=0.025)<br>95%CI(-0.05, 0.05), t=0,<br>p=>0.999           | -13.6 (SE=2.316)<br>95%CI(-18.207, -8.993), t=-5.873,<br>p=<0.001    | -6.31 (SE=1.04)<br>95%CI(-8.379, -4.241), t=-6.068,<br>p=<0.001    | -6.1 (SE=1.032)<br>95%CI(-8.154, -4.046),<br>t=-5.908,<br>p=<0.001 | -2.1 (SE=0.725)<br>95%CI(-3.543, -0.657), t=-2.896, p=0.005     |
| T1-T2  | 0.028 (SE=0.1)<br>95%CI(-0.17, 0.225),<br>t=0.277,<br>p=0.782   | 0.19 (SE=0.094)<br>95%CI(0.006, 0.375), t=2.03,<br>p=0.043       | 0.31 (SE=0.075)<br>95%CI(0.163, 0.456),<br>t=4.145,<br>p=<0.001  | 1.286 (SE=0.294)<br>95%CI(0.708, 1.864),<br>t=4.373,<br>p=<0.001 | -2.064 (SE=1.13)<br>95%CI(-4.287, 0.159),<br>t=-1.826,<br>p=0.069   | -0.105 (SE=0.641)<br>95%CI(-1.365, 1.155),<br>t=-0.163,<br>p=0.87   | -0.186 (SE=0.714)<br>95%CI(-1.589, 1.218),<br>t=-0.26,<br>p=0.795  | -1.31 (SE=0.4)<br>95%CI(-2.097, -0.522),<br>t=-3.271,<br>p=0.001   | 0.02 (SE=0.025)<br>95%CI(-0.03, 0.07), t=0.792,<br>p=0.431     | -7.6 (SE=2.316)<br>95%CI(-12.207, -2.993), t=-3.282, p=0.002         | -1.91 (SE=1.04)<br>95%CI(-3.979, 0.159),<br>t=-1.837,<br>p=0.07    | 1.6 (SE=1.032)<br>95%CI(-0.454, 3.654),<br>t=1.55,<br>p=0.125      | 4.2 (SE=0.725)<br>95%CI(2.757, 5.643), t=5.793,<br>p=<0.001     |
| T1-T3  | 0.25 (SE=0.1)<br>95%CI(0.053, 0.447),<br>t=2.493,<br>p=0.013    | 0 (SE=0.094)<br>95%CI(-0.184, 0.184),<br>t=0, p=>0.999           | 0.333 (SE=0.075)<br>95%CI(0.186, 0.48),<br>t=4.464,<br>p=<0.001  | 1.271 (SE=0.294)<br>95%CI(0.693, 1.85),<br>t=4.324,<br>p=<0.001  | -4.014 (SE=1.13)<br>95%CI(-6.237, -1.791),<br>t=-3.551,<br>p=<0.001 | -1.902 (SE=0.641)<br>95%CI(-3.162, -0.642), t=-2.969,<br>p=0.003    | -2.857 (SE=0.714)<br>95%CI(-4.261, -1.454), t=-4.003,<br>p=<0.001  | -3.5 (SE=0.4)<br>95%CI(-4.287, -2.713),<br>t=-8.741,<br>p=<0.001   | -0.14 (SE=0.025)<br>95%CI(-0.19, -0.09), t=-5.546,<br>p=<0.001 | -6.1 (SE=2.316)<br>95%CI(-10.707, -1.493), t=-2.634, p=0.01          | -1.41 (SE=1.04)<br>95%CI(-3.479, 0.659),<br>t=-1.356,<br>p=0.179   | -0.1 (SE=1.032)<br>95%CI(-2.154, 1.954),<br>t=-0.097,<br>p=0.923   | -2.2 (SE=0.725)<br>95%CI(-3.643, -0.757), t=-3.034, p=0.003     |
| T1-T4  | 0.75 (SE=0.1)<br>95%CI(0.553, 0.947),<br>t=7.478,<br>p=<0.001   | 0.119 (SE=0.094)<br>95%CI(-0.065, 0.304),<br>t=1.269,<br>p=0.205 | 0.286 (SE=0.075)<br>95%CI(0.139, 0.433),<br>t=3.826,<br>p=<0.001 | 1.31 (SE=0.294)<br>95%CI(0.731, 1.888),<br>t=4.454,<br>p=<0.001  | -9.133 (SE=1.13)<br>95%CI(-11.356, -6.91),<br>t=-8.08,<br>p=<0.001  | -3.379 (SE=0.641)<br>95%CI(-4.639, -2.119), t=-5.273,<br>p=<0.001   | -2.279 (SE=0.714)<br>95%CI(-3.682, -0.875), t=-3.193,<br>p=0.002   | -2.024 (SE=0.4)<br>95%CI(-2.811, -1.236),<br>t=-5.055,<br>p=<0.001 | 0 (SE=0.025)<br>95%CI(-0.05, 0.05), t=0,<br>p=>0.999           | -21.2 (SE=2.316)<br>95%CI(-25.807, -16.593), t=-9.156,<br>p=<0.001   | -3.81 (SE=1.04)<br>95%CI(-5.879, -1.741), t=-3.664,<br>p=<0.001    | -0.8 (SE=1.032)<br>95%CI(-2.854, 1.254),<br>t=-0.775,<br>p=0.441   | 2.9 (SE=0.725)<br>95%CI(1.457, 4.343), t=4,<br>p=<0.001         |
| T1-T5  | 1.111 (SE=0.1)<br>95%CI(0.914, 1.308),<br>t=11.079,<br>p=<0.001 | 0.167 (SE=0.094)<br>95%CI(-0.018, 0.351),<br>t=1.777,<br>p=0.076 | 0.333 (SE=0.075)<br>95%CI(0.186, 0.48),<br>t=4.464,<br>p=<0.001  | 1.281 (SE=0.294)<br>95%CI(0.703, 1.859),<br>t=4.357,<br>p=<0.001 | -2.443 (SE=1.13)<br>95%CI(-4.666, -0.22),<br>t=-2.161,<br>p=0.031   | -1.26 (SE=0.641)<br>95%CI(-2.52, 0), t=-1.966,<br>p=0.05            | 1.252 (SE=0.714)<br>95%CI(-0.151, 2.656),<br>t=1.755,<br>p=0.08    | -3.262 (SE=0.4)<br>95%CI(-4.049, -2.475),<br>t=-8.147,<br>p=<0.001 | 0 (SE=0.025)<br>95%CI(-0.05, 0.05), t=0,<br>p=>0.999           | 2.2 (SE=2.316)<br>95%CI(-2.407, 6.807), t=0.95,<br>p=0.345           | -3.81 (SE=1.04)<br>95%CI(-4.859, 2.683),<br>t=2.683,<br>p=0.009    | -0.8 (SE=1.032)<br>95%CI(4.646, 8.754),<br>t=6.489,<br>p=<0.001    | -2 (SE=0.725)<br>95%CI(-3.443, -0.557), t=-2.759, p=0.007       |
| T1-T6  | 1.583 (SE=0.1)<br>95%CI(1.386, 1.781),<br>t=15.787,<br>p=<0.001 | 0.119 (SE=0.094)<br>95%CI(-0.065, 0.304),<br>t=1.269,<br>p=0.205 | 0.262 (SE=0.075)<br>95%CI(0.115, 0.409),<br>t=3.507,<br>p=0.001  | 0.771 (SE=0.294)<br>95%CI(0.193, 1.35),<br>t=2.624,<br>p=0.009   | -4.157 (SE=1.13)<br>95%CI(-6.38, -1.934), t=-3.677,<br>p=<0.001     | -1.974 (SE=0.641)<br>95%CI(-3.234, -0.714), t=-3.08, p=0.002        | -1.238 (SE=0.714)<br>95%CI(-2.642, 0.165),<br>t=-1.735,<br>p=0.084 | -3.405 (SE=0.4)<br>95%CI(-4.192, -2.617),<br>t=-8.504,<br>p=<0.001 | -0.14 (SE=0.025)<br>95%CI(-0.19, -0.09), t=-5.546,<br>p=<0.001 | -1.4 (SE=2.316)<br>95%CI(-6.007, 3.207), t=-0.605, p=0.547           | -1.51 (SE=1.04)<br>95%CI(-3.579, 0.559),<br>t=-1.452,<br>p=0.15    | -1.4 (SE=1.032)<br>95%CI(-3.454, 0.654),<br>t=-1.356,<br>p=0.179   | -2.8 (SE=0.725)<br>95%CI(-4.243, -1.357), t=-3.862,<br>p=<0.001 |
| T1-T7  | 1.917 (SE=0.1)<br>95%CI(1.719, 2.114),<br>t=19.111,<br>p=<0.001 | 0.119 (SE=0.094)<br>95%CI(-0.065, 0.304),<br>t=1.269,<br>p=0.205 | 0.167 (SE=0.075)<br>95%CI(0.02, 0.314),<br>t=2.232,<br>p=0.026   | 1.257 (SE=0.294)<br>95%CI(0.679, 1.835),<br>t=4.276,<br>p=<0.001 | -5.967 (SE=1.13)<br>95%CI(-8.19, -3.744), t=-5.278,<br>p=<0.001     | -0.331 (SE=0.641)<br>95%CI(-1.591, 0.929),<br>t=-0.516,<br>p=0.606  | 0.483 (SE=0.714)<br>95%CI(-0.92, 1.887),<br>t=0.677,<br>p=0.499    | -2.071 (SE=0.4)<br>95%CI(-2.859, -1.284),<br>t=-5.174,<br>p=<0.001 | -0.14 (SE=0.025)<br>95%CI(-0.19, -0.09), t=-5.546,<br>p=<0.001 | -12.8 (SE=2.316)<br>95%CI(-17.407, -8.193), t=-5.528,<br>p=<0.001    | -2.31 (SE=1.04)<br>95%CI(-4.379, -0.241), t=-2.221,<br>p=0.029     | -0.5 (SE=1.032)<br>95%CI(-2.554, 1.554),<br>t=-0.484,<br>p=0.629   | 2.8 (SE=0.725)<br>95%CI(1.357, 4.243), t=3.862,<br>p=<0.001     |
| T1-T8  | 2.5 (SE=0.1)<br>95%CI(2.303, 2.697),<br>t=24.927,<br>p=<0.001   | 0 (SE=0.094)<br>95%CI(-0.184, 0.184),<br>t=0, p=>0.999           | 0.119 (SE=0.075)<br>95%CI(-0.028, 0.266),<br>t=1.594,<br>p=0.112 | 1.281 (SE=0.294)<br>95%CI(0.703, 1.859),<br>t=4.357,<br>p=<0.001 | -6.157 (SE=1.13)<br>95%CI(-8.38, -3.934), t=-5.447,<br>p=<0.001     | -0.429 (SE=0.641)<br>95%CI(-1.689, 0.831),<br>t=-0.669,<br>p=0.504  | -0.262 (SE=0.714)<br>95%CI(-1.665, 1.142),<br>t=-0.367,<br>p=0.714 | -3.071 (SE=0.4)<br>95%CI(-3.859, -2.284),<br>t=-7.671,<br>p=<0.001 | -0.11 (SE=0.025)<br>95%CI(-0.16, -0.06), t=-4.357,<br>p=<0.001 | -15.3 (SE=2.316)<br>95%CI(-19.907, -10.693), t=-6.608,<br>p=<0.001   | -0.21 (SE=1.04)<br>95%CI(-2.279, 1.859),<br>t=-0.202,<br>p=0.84    | 1.5 (SE=1.032)<br>95%CI(-0.554, 3.554),<br>t=1.453,<br>p=0.15      | -1.4 (SE=0.725)<br>95%CI(-2.843, 0.043), t=-1.931, p=0.057      |
| T1-T9  | 2.778 (SE=0.1)<br>95%CI(2.58, 2.978),<br>t=29.877,<br>p=<0.001  | 0 (SE=0.094)<br>95%CI(-0.184, 0.184),<br>t=0, p=>0.999           | 0.048 (SE=0.075)<br>95%CI(-0.06, 0.156),<br>t=0.719,<br>p=0.476  | 1.31 (SE=0.294)<br>95%CI(0.731, 1.889),<br>t=4.454,<br>p=<0.001  | -6.705 (SE=1.13)<br>95%CI(-8.929, -4.481),<br>t=-5.973,<br>p=<0.001 | -2.783 (SE=0.641)<br>95%CI(-4.066, -1.501),<br>t=-4.303,<br>p=0.001 | -1.7 (SE=0.714)<br>95%CI(-3.121, -0.279),<br>t=-2.381,<br>p=0.02   | -3.238 (SE=0.4)<br>95%CI(-4.025, -2.451),<br>t=-8.087,<br>p=<0.001 | 0 (SE=0.025)<br>95%CI(-0.05, 0.05), t=0,<br>p=>0.999           | -11.4 (SE=2.316)<br>95%CI(-15.933, -6.867),<br>t=-5.181,<br>p=<0.001 | -5.61 (SE=1.04)<br>95%CI(-7.659, -3.561),<br>t=-5.181,<br>p=<0.001 | -6.4 (SE=1.032)<br>95%CI(-8.439, -4.361),<br>t=-5.908,<br>p=<0.001 | -2.1 (SE=0.725)<br>95%CI(-3.543, -0.657), t=-2.896, p=0.005     |

|        |                                                                       |                                                                           |                                                                                  |                                                                           |                                                                            |                                                                                  |                                                                                  |                                                                           |                                                                          |                                                                                  |                                                                               |                                                                            |                                                                        |
|--------|-----------------------------------------------------------------------|---------------------------------------------------------------------------|----------------------------------------------------------------------------------|---------------------------------------------------------------------------|----------------------------------------------------------------------------|----------------------------------------------------------------------------------|----------------------------------------------------------------------------------|---------------------------------------------------------------------------|--------------------------------------------------------------------------|----------------------------------------------------------------------------------|-------------------------------------------------------------------------------|----------------------------------------------------------------------------|------------------------------------------------------------------------|
|        | 2.975),<br>t=27.696,<br>p=<0.001                                      | 0.184, 0.184),<br>t=0, p=>0.999                                           | 0.099, 0.194),<br>t=0.638,<br>p=0.524                                            | 1.888),<br>t=4.454,<br>p=<0.001                                           | 8.928, -4.482),<br>t=-5.931,<br>p=<0.001                                   | 4.043, -<br>1.523), t=-<br>4.344,<br>p=<0.001                                    | 3.103, -<br>0.297), t=-<br>2.382,<br>p=0.018                                     | 4.025, -2.451),<br>t=-8.087,<br>p=<0.001                                  | 0.05), t=0,<br>p=>0.999                                                  | 16.007, -<br>6.793), t=-<br>4.923,<br>p=<0.001                                   | 7.679, -<br>3.541), t=-<br>5.395,<br>p=<0.001                                 | 8.454, -4.346),<br>t=-6.199,<br>p=<0.001                                   | -0.657), t=-<br>2.896, p=0.005                                         |
| T2-T10 | 2.833<br>(SE=0.1)<br>95%CI(2.636,<br>3.031),<br>t=28.25,<br>p=<0.001  | -0.119<br>(SE=0.094)<br>95%CI(-<br>0.304, 0.065),<br>t=-1.269,<br>p=0.205 | -0.286<br>(SE=0.075)<br>95%CI(-<br>0.433, -<br>0.139), t=-<br>3.826,<br>p=<0.001 | 0.029<br>(SE=0.294)<br>95%CI(-0.55,<br>0.607),<br>t=0.097,<br>p=0.923     | -4.688<br>(SE=1.13)<br>95%CI(-<br>6.911, -2.465),<br>t=-4.147,<br>p=<0.001 | -2.012<br>(SE=0.641)<br>95%CI(-<br>3.272, -<br>0.752), t=-<br>3.14, p=0.002      | -1.767<br>(SE=0.714)<br>95%CI(-3.17,<br>-0.363), t=-<br>2.475,<br>p=0.014        | -1.929<br>(SE=0.4)<br>95%CI(-<br>2.716, -1.141),<br>t=-4.817,<br>p=<0.001 | -0.02<br>(SE=0.025)<br>95%CI(-0.07,<br>0.03), t=-<br>0.792,<br>p=0.431   | -6 (SE=2.316)<br>95%CI(-<br>10.607, -<br>1.393), t=-<br>2.591, p=0.011           | -4.4<br>(SE=1.04)<br>95%CI(-<br>6.469, -<br>2.331), t=-<br>4.231,<br>p=<0.001 | -7.7<br>(SE=1.032)<br>95%CI(-<br>9.754, -5.646),<br>t=-7.458,<br>p=<0.001  | -6.3 (SE=0.725)<br>95%CI(-7.743,<br>-4.857), t=-<br>8.689,<br>p=<0.001 |
| T2-T3  | 0.222<br>(SE=0.1)<br>95%CI(0.025,<br>0.42),<br>t=2.216,<br>p=0.027    | -0.19<br>(SE=0.094)<br>95%CI(-<br>0.375, -0.006),<br>t=-2.03,<br>p=0.043  | 0.024<br>(SE=0.075)<br>95%CI(-<br>0.123, 0.171),<br>t=0.319,<br>p=0.75           | -0.014<br>(SE=0.294)<br>95%CI(-<br>0.592, 0.564),<br>t=-0.049,<br>p=0.961 | -1.95<br>(SE=1.13)<br>95%CI(-<br>4.173, 0.273),<br>t=-1.725,<br>p=0.085    | -1.798<br>(SE=0.641)<br>95%CI(-<br>3.058, -<br>0.538), t=-<br>2.805,<br>p=0.005  | -2.671<br>(SE=0.714)<br>95%CI(-<br>4.075, -<br>1.268), t=-<br>3.743,<br>p=<0.001 | -2.19 (SE=0.4)<br>95%CI(-<br>2.978, -1.403),<br>t=-5.471,<br>p=<0.001     | -0.16<br>(SE=0.025)<br>95%CI(-0.21,<br>-0.11), t=-<br>6.338,<br>p=<0.001 | 1.5 (SE=2.316)<br>95%CI(-3.107,<br>6.107),<br>t=0.648,<br>p=0.519                | 0.5 (SE=1.04)<br>95%CI(-<br>1.569, 2.569),<br>t=0.481,<br>p=0.632             | -1.7<br>(SE=1.032)<br>95%CI(-<br>3.754, 0.354),<br>t=-1.647,<br>p=0.104    | -6.4 (SE=0.725)<br>95%CI(-7.843,<br>-4.957), t=-<br>8.827,<br>p=<0.001 |
| T2-T4  | 0.722<br>(SE=0.1)<br>95%CI(0.525,<br>0.92),<br>t=7.201,<br>p=<0.001   | -0.071<br>(SE=0.094)<br>95%CI(-<br>0.256, 0.113),<br>t=-0.761,<br>p=0.447 | -0.024<br>(SE=0.075)<br>95%CI(-<br>0.171, 0.123),<br>t=-0.319,<br>p=0.75         | 0.024<br>(SE=0.294)<br>95%CI(-<br>0.554, 0.602),<br>t=0.081,<br>p=0.936   | -7.069<br>(SE=1.13)<br>95%CI(-<br>9.292, -4.846),<br>t=-6.253,<br>p=<0.001 | -3.274<br>(SE=0.641)<br>95%CI(-<br>4.534, -<br>2.014), t=-<br>5.109,<br>p=<0.001 | -2.093<br>(SE=0.714)<br>95%CI(-<br>3.496, -<br>0.689), t=-<br>2.932,<br>p=0.004  | -0.714<br>(SE=0.4)<br>95%CI(-<br>1.502, 0.073),<br>t=-1.784,<br>p=0.075   | -0.02<br>(SE=0.025)<br>95%CI(-0.07,<br>0.03), t=-<br>0.792,<br>p=0.431   | -13.6<br>(SE=2.316)<br>95%CI(-<br>18.207, -<br>8.993), t=-<br>5.873,<br>p=<0.001 | -1.9<br>(SE=1.04)<br>95%CI(-<br>3.969, 0.169),<br>t=-2.325,<br>p=0.071        | -2.4<br>(SE=1.032)<br>95%CI(-<br>4.454, -0.346),<br>t=-2.325,<br>p=0.023   | -1.3 (SE=0.725)<br>95%CI(-2.743,<br>0.143), t=-<br>1.793, p=0.077      |
| T2-T5  | 1.083<br>(SE=0.1)<br>95%CI(0.886,<br>1.281),<br>t=10.802,<br>p=<0.001 | -0.024<br>(SE=0.094)<br>95%CI(-<br>0.208, 0.161),<br>t=-0.254,<br>p=0.8   | 0.024<br>(SE=0.075)<br>95%CI(-<br>0.123, 0.171),<br>t=0.319,<br>p=0.75           | -0.005<br>(SE=0.294)<br>95%CI(-<br>0.583, 0.573),<br>t=-0.016,<br>p=0.987 | -0.379<br>(SE=1.13)<br>95%CI(-<br>2.601, 1.844),<br>t=-0.335,<br>p=0.738   | -1.155<br>(SE=0.641)<br>95%CI(-<br>2.415, 0.105),<br>t=-1.802,<br>p=0.072        | 1.438<br>(SE=0.714)<br>95%CI(0.035,<br>2.842),<br>t=2.015,<br>p=0.045            | -1.952<br>(SE=0.4)<br>95%CI(-2.74,<br>-1.165), t=-<br>4.876,<br>p=<0.001  | -0.02<br>(SE=0.025)<br>95%CI(-0.07,<br>0.03), t=-<br>0.792,<br>p=0.431   | 9.8 (SE=2.316)<br>95%CI(5.193,<br>14.407),<br>t=4.232,<br>p=<0.001               | 4.7 (SE=1.04)<br>95%CI(2.631,<br>6.769),<br>t=4.519,<br>p=<0.001              | 5.1<br>(SE=1.032)<br>95%CI(3.046,<br>7.154), t=4.94,<br>p=<0.001           | -6.2 (SE=0.725)<br>95%CI(-7.643,<br>-4.757), t=-<br>8.551,<br>p=<0.001 |
| T2-T6  | 1.556<br>(SE=0.1)<br>95%CI(1.358,<br>1.753),<br>t=15.51,<br>p=<0.001  | -0.071<br>(SE=0.094)<br>95%CI(-<br>0.256, 0.113),<br>t=-0.761,<br>p=0.447 | -0.048<br>(SE=0.075)<br>95%CI(-<br>0.194, 0.099),<br>t=-0.638,<br>p=0.524        | -0.514<br>(SE=0.294)<br>95%CI(-<br>1.092, 0.064),<br>t=-1.749,<br>p=0.081 | -2.093<br>(SE=1.13)<br>95%CI(-<br>4.316, 0.13),<br>t=-1.851,<br>p=0.065    | -1.869<br>(SE=0.641)<br>95%CI(-<br>3.129, -<br>0.609), t=-<br>2.917,<br>p=0.004  | -1.052<br>(SE=0.714)<br>95%CI(-<br>2.456, 0.351),<br>t=-1.474,<br>p=0.141        | -2.095<br>(SE=0.4)<br>95%CI(-<br>2.883, -1.308),<br>t=-5.233,<br>p=<0.001 | -0.16<br>(SE=0.025)<br>95%CI(-0.21,<br>-0.11), t=-<br>6.338,<br>p=<0.001 | 6.2 (SE=2.316)<br>95%CI(1.593,<br>10.807),<br>t=2.678,<br>p=0.009                | 0.4 (SE=1.04)<br>95%CI(-<br>1.669, 2.469),<br>t=0.385,<br>p=0.702             | -3 (SE=1.032)<br>95%CI(-<br>5.054, -0.946),<br>t=-2.906,<br>p=0.005        | -7 (SE=0.725)<br>95%CI(-8.443,<br>-5.557), t=-<br>9.655,<br>p=<0.001   |
| T2-T7  | 1.889<br>(SE=0.1)<br>95%CI(1.692,<br>2.086),<br>t=18.834,<br>p=<0.001 | -0.071<br>(SE=0.094)<br>95%CI(-<br>0.256, 0.113),<br>t=-0.761,<br>p=0.447 | -0.143<br>(SE=0.075)<br>95%CI(-0.29,<br>0.004), t=-<br>1.913,<br>p=0.057         | -0.029<br>(SE=0.294)<br>95%CI(-<br>0.607, 0.55),<br>t=-0.097,<br>p=0.923  | -3.902<br>(SE=1.13)<br>95%CI(-<br>6.125, -1.679),<br>t=-3.452,<br>p=0.001  | -0.226<br>(SE=0.641)<br>95%CI(-<br>1.486, 1.034),<br>t=-0.353,<br>p=0.724        | 0.669<br>(SE=0.714)<br>95%CI(-<br>0.734, 2.073),<br>t=0.937,<br>p=0.349          | -0.762<br>(SE=0.4)<br>95%CI(-<br>1.549, 0.025),<br>t=-1.903,<br>p=0.058   | -0.16<br>(SE=0.025)<br>95%CI(-0.21,<br>-0.11), t=-<br>6.338,<br>p=<0.001 | -5.2<br>(SE=2.316)<br>95%CI(-9.807,<br>-0.593), t=-<br>2.246, p=0.027            | -0.4<br>(SE=1.04)<br>95%CI(-<br>2.469, 1.669),<br>t=-0.385,<br>p=0.702        | -2.1<br>(SE=1.032)<br>95%CI(-<br>4.154, -0.046),<br>t=-2.034,<br>p=0.045   | -1.4 (SE=0.725)<br>95%CI(-2.843,<br>0.043), t=-<br>1.931, p=0.057      |
| T2-T8  | 2.472<br>(SE=0.1)<br>95%CI(2.275,<br>2.67),<br>t=24.65,<br>p=<0.001   | -0.19<br>(SE=0.094)<br>95%CI(-<br>0.375, -0.006),<br>t=-2.03,<br>p=0.043  | -0.19<br>(SE=0.075)<br>95%CI(-<br>0.337, -<br>0.044), t=-<br>2.551,<br>p=0.011   | -0.005<br>(SE=0.294)<br>95%CI(-<br>0.583, 0.573),<br>t=-0.016,<br>p=0.987 | -4.093<br>(SE=1.13)<br>95%CI(-<br>6.316, -1.87),<br>t=-3.621,<br>p=<0.001  | -0.324<br>(SE=0.641)<br>95%CI(-<br>1.584, 0.936),<br>t=-0.505,<br>p=0.614        | -0.076<br>(SE=0.714)<br>95%CI(-1.48,<br>1.327), t=-<br>0.107,<br>p=0.915         | -1.762<br>(SE=0.4)<br>95%CI(-<br>2.549, -0.975),<br>t=-4.4,<br>p=<0.001   | -0.13<br>(SE=0.025)<br>95%CI(-0.18,<br>-0.08), t=-<br>5.15,<br>p=<0.001  | -7.7<br>(SE=2.316)<br>95%CI(-<br>12.307, -<br>3.093), t=-<br>3.325, p=0.001      | 1.7 (SE=1.04)<br>95%CI(-<br>0.369, 3.769),<br>t=1.635,<br>p=0.106             | -0.1<br>(SE=1.032)<br>95%CI(-<br>2.154, 1.954),<br>t=-0.097,<br>p=0.923    | -5.6 (SE=0.725)<br>95%CI(-7.043,<br>-4.157), t=-<br>7.724,<br>p=<0.001 |
| T2-T9  | 2.75 (SE=0.1)<br>95%CI(2.553,<br>2.947),<br>t=27.42,<br>p=<0.001      | -0.19<br>(SE=0.094)<br>95%CI(-<br>0.375, -0.006),<br>t=-2.03,<br>p=0.043  | -0.262<br>(SE=0.075)<br>95%CI(-<br>0.409, -<br>0.115), t=-<br>3.507,<br>p=0.001  | 0.024<br>(SE=0.294)<br>95%CI(-<br>0.554, 0.602),<br>t=0.081,<br>p=0.936   | -4.64<br>(SE=1.13)<br>95%CI(-<br>6.863, -2.418),<br>t=-4.105,<br>p=<0.001  | -2.679<br>(SE=0.641)<br>95%CI(-<br>3.939, -<br>1.419), t=-<br>4.18,<br>p=<0.001  | -1.514<br>(SE=0.714)<br>95%CI(-<br>2.918, -<br>0.111), t=-<br>2.122,<br>p=0.035  | -1.929<br>(SE=0.4)<br>95%CI(-<br>2.716, -1.141),<br>t=-4.817,<br>p=<0.001 | -0.02<br>(SE=0.025)<br>95%CI(-0.07,<br>0.03), t=-<br>0.792,<br>p=0.431   | -3.8<br>(SE=2.316)<br>95%CI(-8.407,<br>0.807), t=-<br>1.641, p=0.105             | -3.7<br>(SE=1.04)<br>95%CI(-<br>5.769, -<br>1.631), t=-<br>3.558,<br>p=0.001  | -8 (SE=1.032)<br>95%CI(-<br>10.054, -<br>5.946), t=-<br>7.748,<br>p=<0.001 | -6.3 (SE=0.725)<br>95%CI(-7.743,<br>-4.857), t=-<br>8.689,<br>p=<0.001 |
| T3-T10 | 2.611<br>(SE=0.1)<br>95%CI(2.414,<br>2.808),<br>t=26.035,<br>p=<0.001 | 0.071<br>(SE=0.094)<br>95%CI(-<br>0.113, 0.256),<br>t=0.761,<br>p=0.447   | -0.31<br>(SE=0.075)<br>95%CI(-<br>0.456, -<br>0.163), t=-                        | 0.043<br>(SE=0.294)<br>95%CI(-<br>0.535, 0.621),<br>t=0.146,<br>p=0.884   | -2.738<br>(SE=1.13)<br>95%CI(-<br>4.961, -0.515),<br>t=-2.422,<br>p=0.016  | -0.214<br>(SE=0.641)<br>95%CI(-<br>1.474, 1.046),<br>t=-0.334,<br>p=0.738        | 0.905<br>(SE=0.714)<br>95%CI(-<br>0.499, 2.308),<br>t=1.268,<br>p=0.206          | 0.262<br>(SE=0.4)<br>95%CI(-<br>0.525, 1.049),<br>t=0.654,<br>p=0.513     | 0.14<br>(SE=0.025)<br>95%CI(0.09,<br>0.19), t=5.546,<br>p=<0.001         | -7.5<br>(SE=2.316)<br>95%CI(-<br>12.107, -<br>2.893), t=-<br>3.239, p=0.002      | -4.9<br>(SE=1.04)<br>95%CI(-<br>6.969, -<br>2.831), t=-                       | -6 (SE=1.032)<br>95%CI(-<br>8.054, -3.946),<br>t=-5.811,<br>p=<0.001       | 0.1 (SE=0.725)<br>95%CI(-1.343,<br>1.543), t=0.138,<br>p=0.891         |

|        |                                                                    |                                                                       |                                                                       |                                                                       |                                                                        |                                                                       |                                                                      |                                                                      |                                                                  |                                                                       |                                                                    |                                                                       |                                                                 |
|--------|--------------------------------------------------------------------|-----------------------------------------------------------------------|-----------------------------------------------------------------------|-----------------------------------------------------------------------|------------------------------------------------------------------------|-----------------------------------------------------------------------|----------------------------------------------------------------------|----------------------------------------------------------------------|------------------------------------------------------------------|-----------------------------------------------------------------------|--------------------------------------------------------------------|-----------------------------------------------------------------------|-----------------------------------------------------------------|
|        |                                                                    | 4.145,<br>p=<0.001                                                    |                                                                       |                                                                       |                                                                        |                                                                       |                                                                      |                                                                      |                                                                  |                                                                       |                                                                    | 4.712,<br>p=<0.001                                                    |                                                                 |
| T3-T4  | 0.5 (SE=0.1)<br>95%CI(0.303, 0.697),<br>t=4.985,<br>p=<0.001       | 0.119<br>(SE=0.094)<br>95%CI(-0.065, 0.304),<br>t=1.269,<br>p=0.205   | -0.048<br>(SE=0.075)<br>95%CI(-0.194, 0.099),<br>t=-0.638,<br>p=0.524 | 0.038<br>(SE=0.294)<br>95%CI(-0.54, 0.616),<br>t=0.13,<br>p=0.897     | -5.119<br>(SE=1.13)<br>95%CI(-7.342, -2.896),<br>t=-4.528,<br>p=<0.001 | -1.476<br>(SE=0.641)<br>95%CI(-2.736, -0.216), t=-2.304,<br>p=0.022   | 0.579<br>(SE=0.714)<br>95%CI(-0.825, 1.982),<br>t=0.811,<br>p=0.418  | 1.476<br>(SE=0.4)<br>95%CI(0.689, 2.264),<br>t=3.687,<br>p=<0.001    | 0.14<br>(SE=0.025)<br>95%CI(0.09, 0.19), t=5.546,<br>p=<0.001    | -15.1<br>(SE=2.316)<br>95%CI(-19.707, -10.493), t=-6.521,<br>p=<0.001 | -2.4<br>(SE=1.04)<br>95%CI(-4.469, -0.331), t=-2.308,<br>p=0.024   | -0.7<br>(SE=1.032)<br>95%CI(-2.754, 1.354),<br>t=-0.678,<br>p=0.5     | 5.1 (SE=0.725)<br>95%CI(3.657, 6.543), t=7.034,<br>p=<0.001     |
| T3-T5  | 0.861<br>(SE=0.1)<br>95%CI(0.664, 1.058),<br>t=8.586,<br>p=<0.001  | 0.167<br>(SE=0.094)<br>95%CI(-0.018, 0.351),<br>t=1.777,<br>p=0.076   | 0 (SE=0.075)<br>95%CI(-0.147, 0.147),<br>t=0, p=>0.999                | 0.01<br>(SE=0.294)<br>95%CI(-0.569, 0.588),<br>t=0.032,<br>p=0.974    | 1.571<br>(SE=1.13)<br>95%CI(-0.651, 3.794),<br>t=1.39,<br>p=0.165      | 0.643<br>(SE=0.641)<br>95%CI(-0.617, 1.903),<br>t=1.003,<br>p=0.316   | 4.11<br>(SE=0.714)<br>95%CI(2.706, 5.513),<br>t=5.758,<br>p=<0.001   | 0.238<br>(SE=0.4)<br>95%CI(-0.549, 1.025),<br>t=0.595,<br>p=0.552    | 0.14<br>(SE=0.025)<br>95%CI(0.09, 0.19), t=5.546,<br>p=<0.001    | 8.3 (SE=2.316)<br>95%CI(3.693, 12.907),<br>t=3.585,<br>p=0.001        | 4.2 (SE=1.04)<br>95%CI(2.131, 6.269),<br>t=4.039,<br>p=<0.001      | 6.8<br>(SE=1.032)<br>95%CI(4.746, 8.854),<br>t=6.586,<br>p=<0.001     | 0.2 (SE=0.725)<br>95%CI(-1.243, 1.643), t=0.276,<br>p=0.783     |
| T3-T6  | 1.333<br>(SE=0.1)<br>95%CI(1.136, 1.531),<br>t=13.294,<br>p=<0.001 | 0.119<br>(SE=0.094)<br>95%CI(-0.065, 0.304),<br>t=1.269,<br>p=0.205   | -0.071<br>(SE=0.075)<br>95%CI(-0.218, 0.075),<br>t=-0.957,<br>p=0.339 | -0.5<br>(SE=0.294)<br>95%CI(-1.078, 0.078),<br>t=-1.701,<br>p=0.09    | -0.143<br>(SE=1.13)<br>95%CI(-2.366, 2.08),<br>t=-0.126,<br>p=0.9      | -0.071<br>(SE=0.641)<br>95%CI(-1.331, 1.189),<br>t=-0.111,<br>p=0.911 | 1.619<br>(SE=0.714)<br>95%CI(0.216, 3.023),<br>t=2.268,<br>p=0.024   | 0.095<br>(SE=0.4)<br>95%CI(-0.692, 0.883),<br>t=0.238,<br>p=0.812    | 0 (SE=0.025)<br>95%CI(-0.05, 0.05), t=0,<br>p=>0.999             | 4.7 (SE=2.316)<br>95%CI(0.093, 9.307), t=2.03,<br>p=0.046             | -0.1<br>(SE=1.04)<br>95%CI(-2.169, 1.969),<br>t=-0.096,<br>p=0.924 | -1.3<br>(SE=1.032)<br>95%CI(-3.354, 0.754),<br>t=-1.259,<br>p=0.212   | -0.6 (SE=0.725)<br>95%CI(-2.043, 0.843), t=-0.828,<br>p=0.41    |
| T3-T7  | 1.667<br>(SE=0.1)<br>95%CI(1.469, 1.864),<br>t=16.618,<br>p=<0.001 | 0.119<br>(SE=0.094)<br>95%CI(-0.065, 0.304),<br>t=1.269,<br>p=0.205   | -0.167<br>(SE=0.075)<br>95%CI(-0.314, -0.02),<br>t=-2.232,<br>p=0.026 | -0.014<br>(SE=0.294)<br>95%CI(-0.592, 0.564),<br>t=-0.049,<br>p=0.961 | -1.952<br>(SE=1.13)<br>95%CI(-4.175, 0.271),<br>t=-1.727,<br>p=0.085   | 1.571<br>(SE=0.641)<br>95%CI(0.311, 2.831),<br>t=2.452,<br>p=0.015    | 3.34<br>(SE=0.714)<br>95%CI(1.937, 4.744),<br>t=4.68,<br>p=<0.001    | 1.429<br>(SE=0.4)<br>95%CI(0.641, 2.216),<br>t=3.568,<br>p=<0.001    | 0 (SE=0.025)<br>95%CI(-0.05, 0.05), t=0,<br>p=>0.999             | -6.7<br>(SE=2.316)<br>95%CI(-11.307, -2.093), t=-2.894,<br>p=0.005    | -0.9<br>(SE=1.04)<br>95%CI(-2.969, 1.169),<br>t=-0.865,<br>p=0.389 | -0.4<br>(SE=1.032)<br>95%CI(-2.454, 1.654),<br>t=-0.387,<br>p=0.699   | 5 (SE=0.725)<br>95%CI(3.557, 6.443), t=6.896,<br>p=<0.001       |
| T3-T8  | 2.25 (SE=0.1)<br>95%CI(2.053, 2.447),<br>t=22.434,<br>p=<0.001     | 0 (SE=0.094)<br>95%CI(-0.184, 0.184),<br>t=0, p=>0.999                | -0.214<br>(SE=0.075)<br>95%CI(-0.361, -0.067), t=-2.87,<br>p=0.004    | 0.01<br>(SE=0.294)<br>95%CI(-0.569, 0.588),<br>t=0.032,<br>p=0.974    | -2.143<br>(SE=1.13)<br>95%CI(-4.366, 0.08),<br>t=-1.896,<br>p=0.059    | 1.474<br>(SE=0.641)<br>95%CI(0.214, 2.734), t=2.3,<br>p=0.022         | 2.595<br>(SE=0.714)<br>95%CI(1.192, 3.999),<br>t=3.636,<br>p=<0.001  | 0.429<br>(SE=0.4)<br>95%CI(-0.359, 1.216),<br>t=1.07,<br>p=0.285     | 0.03<br>(SE=0.025)<br>95%CI(-0.02, 0.08), t=1.188,<br>p=0.238    | -9.2<br>(SE=2.316)<br>95%CI(-13.807, -4.593), t=-3.973,<br>p=<0.001   | 1.2 (SE=1.04)<br>95%CI(-0.869, 3.269),<br>t=1.154,<br>p=0.252      | 1.6<br>(SE=1.032)<br>95%CI(-0.454, 3.654),<br>t=1.55,<br>p=0.125      | 0.8 (SE=0.725)<br>95%CI(-0.643, 2.243), t=1.103,<br>p=0.273     |
| T3-T9  | 2.528<br>(SE=0.1)<br>95%CI(2.33, 2.725),<br>t=25.204,<br>p=<0.001  | 0 (SE=0.094)<br>95%CI(-0.184, 0.184),<br>t=0, p=>0.999                | -0.286<br>(SE=0.075)<br>95%CI(-0.433, -0.139), t=-3.826,<br>p=<0.001  | 0.038<br>(SE=0.294)<br>95%CI(-0.54, 0.616),<br>t=0.13,<br>p=0.897     | -2.69<br>(SE=1.13)<br>95%CI(-4.913, -0.468),<br>t=-2.38,<br>p=0.018    | -0.881<br>(SE=0.641)<br>95%CI(-2.141, 0.379),<br>t=-1.375,<br>p=0.17  | 1.157<br>(SE=0.714)<br>95%CI(-0.246, 2.561),<br>t=-1.621,<br>p=0.106 | 0.262<br>(SE=0.4)<br>95%CI(-0.525, 1.049),<br>t=-0.654,<br>p=0.513   | 0.14<br>(SE=0.025)<br>95%CI(0.09, 0.19), t=5.546,<br>p=<0.001    | -5.3<br>(SE=2.316)<br>95%CI(-9.907, -0.693), t=-2.289,<br>p=0.025     | -4.2<br>(SE=1.04)<br>95%CI(-6.269, -2.131), t=-4.039,<br>p=<0.001  | -6.3<br>(SE=1.032)<br>95%CI(-8.354, -4.246),<br>t=-6.102,<br>p=<0.001 | 0.1 (SE=0.725)<br>95%CI(-1.343, 1.543), t=0.138,<br>p=0.891     |
| T4-T10 | 2.111<br>(SE=0.1)<br>95%CI(1.914, 2.308),<br>t=21.049,<br>p=<0.001 | -0.048<br>(SE=0.094)<br>95%CI(-0.232, 0.137),<br>t=-0.508,<br>p=0.612 | -0.262<br>(SE=0.075)<br>95%CI(-0.409, -0.115), t=-3.507,<br>p=0.001   | 0.005<br>(SE=0.294)<br>95%CI(-0.573, 0.583),<br>t=0.016,<br>p=0.987   | 2.381<br>(SE=1.13)<br>95%CI(0.158, 4.604),<br>t=2.106,<br>p=0.036      | 1.262<br>(SE=0.641)<br>95%CI(0.002, 2.522),<br>t=1.969,<br>p=0.05     | 0.326<br>(SE=0.714)<br>95%CI(-1.077, 1.73),<br>t=0.457,<br>p=0.648   | -1.214<br>(SE=0.4)<br>95%CI(-2.002, -0.427),<br>t=-3.033,<br>p=0.003 | 0 (SE=0.025)<br>95%CI(-0.05, 0.05), t=0,<br>p=>0.999             | 7.6 (SE=2.316)<br>95%CI(2.993, 12.207),<br>t=3.282,<br>p=0.002        | -2.5<br>(SE=1.04)<br>95%CI(-4.569, -0.431), t=-2.404,<br>p=0.019   | -5.3<br>(SE=1.032)<br>95%CI(-7.354, -3.246),<br>t=-5.133,<br>p=<0.001 | -5 (SE=0.725)<br>95%CI(-6.443, -3.557), t=-6.896,<br>p=<0.001   |
| T4-T5  | 0.361<br>(SE=0.1)<br>95%CI(0.164, 0.558),<br>t=3.601,<br>p=<0.001  | 0.048<br>(SE=0.094)<br>95%CI(-0.137, 0.232),<br>t=0.508,<br>p=0.612   | 0.048<br>(SE=0.075)<br>95%CI(-0.099, 0.194),<br>t=0.638,<br>p=0.524   | -0.029<br>(SE=0.294)<br>95%CI(-0.607, 0.55),<br>t=-0.097,<br>p=0.923  | 6.69<br>(SE=1.13)<br>95%CI(4.468, 8.913),<br>t=5.919,<br>p=<0.001      | 2.119<br>(SE=0.641)<br>95%CI(0.859, 3.379),<br>t=3.307,<br>p=0.001    | 3.531<br>(SE=0.714)<br>95%CI(2.127, 4.934),<br>t=4.947,<br>p=<0.001  | -1.238<br>(SE=0.4)<br>95%CI(-2.025, -0.451),<br>t=-3.092,<br>p=0.002 | 0 (SE=0.025)<br>95%CI(-0.05, 0.05), t=0,<br>p=>0.999             | 23.4<br>(SE=2.316)<br>95%CI(18.793, 28.007),<br>t=10.106,<br>p=<0.001 | 6.6 (SE=1.04)<br>95%CI(4.531, 8.669),<br>t=6.346,<br>p=<0.001      | 7.5<br>(SE=1.032)<br>95%CI(5.446, 9.554),<br>t=7.264,<br>p=<0.001     | -4.9 (SE=0.725)<br>95%CI(-6.343, -3.457), t=-6.758,<br>p=<0.001 |
| T4-T6  | 0.833<br>(SE=0.1)<br>95%CI(0.636, 1.031),<br>t=8.309,<br>p=<0.001  | 0 (SE=0.094)<br>95%CI(-0.184, 0.184),<br>t=0, p=>0.999                | -0.024<br>(SE=0.075)<br>95%CI(-0.171, 0.123),<br>t=-0.319,<br>p=0.75  | -0.538<br>(SE=0.294)<br>95%CI(-1.116, 0.04),<br>t=-1.83,<br>p=0.068   | 4.976<br>(SE=1.13)<br>95%CI(2.753, 7.199),<br>t=4.402,<br>p=<0.001     | 1.405<br>(SE=0.641)<br>95%CI(0.145, 2.665),<br>t=2.192,<br>p=0.029    | 1.04<br>(SE=0.714)<br>95%CI(-0.363, 2.444),<br>t=1.458,<br>p=0.146   | -1.381<br>(SE=0.4)<br>95%CI(-2.168, -0.594),<br>t=-3.449,<br>p=0.001 | -0.14<br>(SE=0.025)<br>95%CI(-0.19, 0.09), t=-5.546,<br>p=<0.001 | 19.8<br>(SE=2.316)<br>95%CI(15.193, 24.407),<br>t=8.551,<br>p=<0.001  | 2.3 (SE=1.04)<br>95%CI(0.231, 4.369),<br>t=2.212,<br>p=0.03        | -0.6<br>(SE=1.032)<br>95%CI(-2.654, 1.454),<br>t=-0.581,<br>p=0.563   | -5.7 (SE=0.725)<br>95%CI(-7.143, -4.257), t=-7.862,<br>p=<0.001 |
| T4-T7  | 1.167<br>(SE=0.1)<br>95%CI(0.969, 1.364),<br>t=0, p=>0.999         | 0 (SE=0.094)<br>95%CI(-0.184, 0.184),<br>t=0, p=>0.999                | -0.119<br>(SE=0.075)<br>95%CI(-0.266, 0.028),<br>t=0.631, 0.526),     | -0.052<br>(SE=0.294)<br>95%CI(-0.631, 0.526),                         | 3.167<br>(SE=1.13)<br>95%CI(0.944, 4.308),                             | 3.048<br>(SE=0.641)<br>95%CI(1.788, 4.308),                           | 2.762<br>(SE=0.714)<br>95%CI(1.358, 4.165),                          | -0.048<br>(SE=0.4)<br>95%CI(-0.835, 0.74),                           | -0.14<br>(SE=0.025)<br>95%CI(-0.19, -0.09), t=-                  | 8.4 (SE=2.316)<br>95%CI(3.793, 13.007),                               | 1.5 (SE=1.04)<br>95%CI(-0.569, 3.569),                             | 0.3<br>(SE=1.032)<br>95%CI(-1.754, 2.354),                            | -0.1 (SE=0.725)<br>95%CI(-1.543, 1.343), t=-0.138,<br>p=0.891   |



|        |                                                                       |                                                                           |                                                                                  |                                                                           |                                                                           |                                                                                 |                                                                                  |                                                                          |                                                                          |                                                                                   |                                                                                |                                                                                    |                                                                        |
|--------|-----------------------------------------------------------------------|---------------------------------------------------------------------------|----------------------------------------------------------------------------------|---------------------------------------------------------------------------|---------------------------------------------------------------------------|---------------------------------------------------------------------------------|----------------------------------------------------------------------------------|--------------------------------------------------------------------------|--------------------------------------------------------------------------|-----------------------------------------------------------------------------------|--------------------------------------------------------------------------------|------------------------------------------------------------------------------------|------------------------------------------------------------------------|
|        | t=11.633,<br>p=<0.001                                                 |                                                                           | t=-1.594,<br>p=0.112                                                             | t=-0.178,<br>p=0.859                                                      | 5.39), t=2.801,<br>p=0.005                                                | t=4.756,<br>p=<0.001                                                            | t=3.87,<br>p=<0.001                                                              | t=-0.119,<br>p=0.905                                                     | 5.546,<br>p=<0.001                                                       | t=3.628,<br>p=<0.001                                                              | t=1.442,<br>p=0.153                                                            | t=0.291,<br>p=0.772                                                                |                                                                        |
| T4-T8  | 1.75 (SE=0.1)<br>95%CI(1.553,<br>1.947),<br>t=17.449,<br>p=<0.001     | -0.119<br>(SE=0.094)<br>95%CI(-<br>0.304, 0.065),<br>t=-1.269,<br>p=0.205 | -0.167<br>(SE=0.075)<br>95%CI(-<br>0.314, -0.02),<br>t=-2.232,<br>p=0.026        | -0.029<br>(SE=0.294)<br>95%CI(-<br>0.607, 0.55),<br>t=-0.097,<br>p=0.923  | 2.976<br>(SE=1.13)<br>95%CI(0.753,<br>5.199),<br>t=2.633,<br>p=0.009      | 2.95<br>(SE=0.641)<br>95%CI(1.69,<br>4.21),<br>t=4.604,<br>p=<0.001             | 2.017<br>(SE=0.714)<br>95%CI(0.613,<br>3.42),<br>t=2.826,<br>p=0.005             | -1.048<br>(SE=0.4)<br>95%CI(-<br>1.835, -0.26),<br>t=-2.616,<br>p=0.009  | -0.11<br>(SE=0.025)<br>95%CI(-0.16,<br>-0.06), t=-<br>4.357,<br>p=<0.001 | 5.9 (SE=2.316)<br>95%CI(1.293,<br>10.507),<br>t=2.548,<br>p=0.013                 | 3.6 (SE=1.04)<br>95%CI(1.531,<br>5.669),<br>t=3.462,<br>p=0.001                | 2.3<br>(SE=1.032)<br>95%CI(0.246,<br>4.354),<br>t=2.228,<br>p=0.029                | -4.3 (SE=0.725)<br>95%CI(-5.743,<br>-2.857), t=-<br>5.931,<br>p=<0.001 |
| T4-T9  | 2.028<br>(SE=0.1)<br>95%CI(1.83,<br>2.225),<br>t=20.218,<br>p=<0.001  | -0.119<br>(SE=0.094)<br>95%CI(-<br>0.304, 0.065),<br>t=-1.269,<br>p=0.205 | -0.238<br>(SE=0.075)<br>95%CI(-<br>0.385, -<br>0.091), t=-<br>3.188,<br>p=0.002  | 0 (SE=0.294)<br>95%CI(-<br>0.578, 0.578),<br>t=0, p=>0.999                | 2.429<br>(SE=1.13)<br>95%CI(0.206,<br>4.651),<br>t=2.148,<br>p=0.032      | 0.595<br>(SE=0.641)<br>95%CI(-<br>0.665, 1.855),<br>t=0.929,<br>p=0.354         | 0.579<br>(SE=0.714)<br>95%CI(-<br>0.825, 1.982),<br>t=0.811,<br>p=0.418          | -1.214<br>(SE=0.4)<br>95%CI(-<br>2.002, -0.427),<br>t=-3.033,<br>p=0.003 | 0 (SE=0.025)<br>95%CI(-0.05,<br>0.05), t=0,<br>p=>0.999                  | 9.8 (SE=2.316)<br>95%CI(5.193,<br>14.407),<br>t=4.232,<br>p=<0.001                | -1.8<br>(SE=1.04)<br>95%CI(-<br>3.869, 0.269),<br>t=-1.731,<br>p=0.087         | -5.6<br>(SE=1.032)<br>95%CI(-<br>7.654, -3.546),<br>t=-5.424,<br>p=<0.001          | -5 (SE=0.725)<br>95%CI(-6.443,<br>-3.557), t=-<br>6.896,<br>p=<0.001   |
| T5-T10 | 1.75 (SE=0.1)<br>95%CI(1.553,<br>1.947),<br>t=17.449,<br>p=<0.001     | -0.095<br>(SE=0.094)<br>95%CI(-0.28,<br>0.089), t=-<br>1.015,<br>p=0.311  | -0.31<br>(SE=0.075)<br>95%CI(-<br>0.456, -<br>0.163), t=-<br>4.145,<br>p=<0.001  | 0.033<br>(SE=0.294)<br>95%CI(-<br>0.545, 0.611),<br>t=0.113,<br>p=0.91    | -4.31<br>(SE=1.13)<br>95%CI(-<br>6.532, -2.087),<br>t=-3.812,<br>p=<0.001 | -0.857<br>(SE=0.641)<br>95%CI(-<br>2.117, 0.403),<br>t=-1.338,<br>p=0.182       | -3.205<br>(SE=0.714)<br>95%CI(-<br>4.608, -<br>1.801), t=-<br>4.49,<br>p=<0.001  | 0.024<br>(SE=0.4)<br>95%CI(-<br>0.764, 0.811),<br>t=0.059,<br>p=0.953    | 0 (SE=0.025)<br>95%CI(-0.05,<br>0.05), t=0,<br>p=>0.999                  | -15.8<br>(SE=2.316)<br>95%CI(-<br>20.407, -<br>11.193), t=-<br>6.824,<br>p=<0.001 | -9.1<br>(SE=1.04)<br>95%CI(-<br>11.169, -<br>7.031), t=-<br>8.75,<br>p=<0.001  | -12.8<br>(SE=1.032)<br>95%CI(-<br>14.854, -<br>10.746), t=-<br>12.397,<br>p=<0.001 | -0.1 (SE=0.725)<br>95%CI(-1.543,<br>1.343), t=-<br>0.138, p=0.891      |
| T5-T6  | 0.472<br>(SE=0.1)<br>95%CI(0.275,<br>0.67),<br>t=4.708,<br>p=<0.001   | -0.048<br>(SE=0.094)<br>95%CI(-<br>0.232, 0.137),<br>t=-0.508,<br>p=0.612 | -0.071<br>(SE=0.075)<br>95%CI(-<br>0.218, 0.075),<br>t=-0.957,<br>p=0.339        | -0.51<br>(SE=0.294)<br>95%CI(-<br>1.088, 0.069),<br>t=-1.733,<br>p=0.084  | -1.714<br>(SE=1.13)<br>95%CI(-<br>3.937, 0.509),<br>t=-1.516,<br>p=0.13   | -0.714<br>(SE=0.641)<br>95%CI(-<br>1.974, 0.546),<br>t=-1.115,<br>p=0.266       | -2.49<br>(SE=0.714)<br>95%CI(-<br>3.894, -<br>1.087), t=-<br>3.489,<br>p=0.001   | -0.143<br>(SE=0.4)<br>95%CI(-0.93,<br>0.644), t=-<br>0.357,<br>p=0.721   | -0.14<br>(SE=0.025)<br>95%CI(-0.19,<br>-0.09), t=-<br>5.546,<br>p=<0.001 | -3.6<br>(SE=2.316)<br>95%CI(-8.207,<br>1.007), t=-<br>1.555, p=0.124              | -4.3<br>(SE=1.04)<br>95%CI(-<br>6.369, -<br>2.231), t=-<br>4.135,<br>p=<0.001  | -8.1<br>(SE=1.032)<br>95%CI(-<br>10.154, -<br>6.046), t=-<br>7.845,<br>p=<0.001    | -0.8 (SE=0.725)<br>95%CI(-2.243,<br>0.643), t=-<br>1.103, p=0.273      |
| T5-T7  | 0.806<br>(SE=0.1)<br>95%CI(0.608,<br>1.003),<br>t=8.032,<br>p=<0.001  | -0.048<br>(SE=0.094)<br>95%CI(-<br>0.232, 0.137),<br>t=-0.508,<br>p=0.612 | -0.167<br>(SE=0.075)<br>95%CI(-<br>0.314, -0.02),<br>t=-2.232,<br>p=0.026        | -0.024<br>(SE=0.294)<br>95%CI(-<br>0.602, 0.554),<br>t=-0.081,<br>p=0.936 | -3.524<br>(SE=1.13)<br>95%CI(-<br>5.747, -1.301),<br>t=-3.117,<br>p=0.002 | 0.929<br>(SE=0.641)<br>95%CI(-<br>0.331, 2.189),<br>t=1.449,<br>p=0.148         | -0.769<br>(SE=0.714)<br>95%CI(-<br>2.173, 0.634),<br>t=-1.078,<br>p=0.282        | 1.19 (SE=0.4)<br>95%CI(0.403,<br>1.978),<br>t=2.973,<br>p=0.003          | -0.14<br>(SE=0.025)<br>95%CI(-0.19,<br>-0.09), t=-<br>5.546,<br>p=<0.001 | -15 (SE=2.316)<br>95%CI(-<br>19.607, -<br>10.393), t=-<br>6.478,<br>p=<0.001      | -5.1<br>(SE=1.04)<br>95%CI(-<br>7.169, -<br>3.031), t=-<br>4.904,<br>p=<0.001  | -7.2<br>(SE=1.032)<br>95%CI(-<br>9.254, -5.146),<br>t=-6.974,<br>p=<0.001          | 4.8 (SE=0.725)<br>95%CI(3.357,<br>6.243), t=6.621,<br>p=<0.001         |
| T5-T8  | 1.389<br>(SE=0.1)<br>95%CI(1.192,<br>1.586),<br>t=13.848,<br>p=<0.001 | -0.167<br>(SE=0.094)<br>95%CI(-<br>0.351, 0.018),<br>t=-1.777,<br>p=0.076 | -0.214<br>(SE=0.075)<br>95%CI(-<br>0.361, -<br>0.067), t=-<br>2.87, p=0.004      | 0 (SE=0.294)<br>95%CI(-<br>0.578, 0.578),<br>t=0, p=>0.999                | -3.714<br>(SE=1.13)<br>95%CI(-<br>5.937, -1.491),<br>t=-3.286,<br>p=0.001 | 0.831<br>(SE=0.641)<br>95%CI(-<br>0.429, 2.091),<br>t=1.297,<br>p=0.196         | -1.514<br>(SE=0.714)<br>95%CI(-<br>2.918, -<br>0.111), t=-<br>2.122,<br>p=0.035  | 0.19 (SE=0.4)<br>95%CI(-<br>0.597, 0.978),<br>t=0.476,<br>p=0.635        | -0.11<br>(SE=0.025)<br>95%CI(-0.16,<br>-0.06), t=-<br>4.357,<br>p=<0.001 | -17.5<br>(SE=2.316)<br>95%CI(-<br>22.107, -<br>12.893), t=-<br>7.558,<br>p=<0.001 | -3 (SE=1.04)<br>95%CI(-<br>5.069, -<br>0.931), t=-<br>2.885,<br>p=0.005        | -5.2<br>(SE=1.032)<br>95%CI(-<br>7.254, -3.146),<br>t=-5.036,<br>p=<0.001          | 0.6 (SE=0.725)<br>95%CI(-0.843,<br>2.043), t=0.828,<br>p=0.41          |
| T5-T9  | 1.667<br>(SE=0.1)<br>95%CI(1.469,<br>1.864),<br>t=16.618,<br>p=<0.001 | -0.167<br>(SE=0.094)<br>95%CI(-<br>0.351, 0.018),<br>t=-1.777,<br>p=0.076 | -0.286<br>(SE=0.075)<br>95%CI(-<br>0.433, -<br>0.139), t=-<br>3.826,<br>p=<0.001 | 0.029<br>(SE=0.294)<br>95%CI(-0.55,<br>0.607),<br>t=0.097,<br>p=0.923     | -4.262<br>(SE=1.13)<br>95%CI(-<br>6.485, -2.039),<br>t=-3.77,<br>p=<0.001 | -1.524<br>(SE=0.641)<br>95%CI(-<br>2.784, -<br>0.264), t=-<br>2.378,<br>p=0.018 | -2.952<br>(SE=0.714)<br>95%CI(-<br>4.356, -<br>1.549), t=-<br>4.137,<br>p=<0.001 | 0.024<br>(SE=0.4)<br>95%CI(-<br>0.764, 0.811),<br>t=0.059,<br>p=0.953    | 0 (SE=0.025)<br>95%CI(-0.05,<br>0.05), t=0,<br>p=>0.999                  | -13.6<br>(SE=2.316)<br>95%CI(-<br>18.207, -<br>8.993), t=-<br>5.873,<br>p=<0.001  | -8.4<br>(SE=1.04)<br>95%CI(-<br>10.469, -<br>6.331), t=-<br>8.077,<br>p=<0.001 | -13.1<br>(SE=1.032)<br>95%CI(-<br>15.154, -<br>11.046), t=-<br>12.688,<br>p=<0.001 | -0.1 (SE=0.725)<br>95%CI(-1.543,<br>1.343), t=-<br>0.138, p=0.891      |
| T6-T10 | 1.278<br>(SE=0.1)<br>95%CI(1.08,<br>1.475),<br>t=12.74,<br>p=<0.001   | -0.048<br>(SE=0.094)<br>95%CI(-<br>0.232, 0.137),<br>t=-0.508,<br>p=0.612 | -0.238<br>(SE=0.075)<br>95%CI(-<br>0.385, -<br>0.091), t=-<br>3.188,<br>p=0.002  | 0.543<br>(SE=0.294)<br>95%CI(-<br>0.035, 1.121),<br>t=1.846,<br>p=0.066   | -2.595<br>(SE=1.13)<br>95%CI(-<br>4.818, -0.372),<br>t=-2.296,<br>p=0.022 | -0.143<br>(SE=0.641)<br>95%CI(-<br>1.403, 1.117),<br>t=0.223,<br>p=0.824        | -0.714<br>(SE=0.714)<br>95%CI(-<br>2.118, 0.689),<br>t=-1.001,<br>p=0.318        | 0.167<br>(SE=0.4)<br>95%CI(-<br>0.621, 0.954),<br>t=0.416,<br>p=0.677    | 0.14<br>(SE=0.025)<br>95%CI(0.09,<br>0.19), t=5.546,<br>p=<0.001         | -12.2<br>(SE=2.316)<br>95%CI(-<br>16.807, -<br>7.593), t=-<br>5.269,<br>p=<0.001  | -4.8<br>(SE=1.04)<br>95%CI(-<br>6.869, -<br>2.731), t=-<br>4.616,<br>p=<0.001  | -4.7<br>(SE=1.032)<br>95%CI(-<br>6.754, -2.646),<br>t=-4.552,<br>p=<0.001          | 0.7 (SE=0.725)<br>95%CI(-0.743,<br>2.143), t=0.965,<br>p=0.337         |
| T6-T7  | 0.333<br>(SE=0.1)<br>95%CI(0.136,<br>0.531),<br>t=3.324,<br>p=0.001   | 0 (SE=0.094)<br>95%CI(-<br>0.184, 0.184),<br>t=0, p=>0.999                | -0.095<br>(SE=0.075)<br>95%CI(-<br>0.242, 0.052),<br>t=-1.275,<br>p=0.203        | 0.486<br>(SE=0.294)<br>95%CI(-<br>0.092, 1.064),<br>t=1.652,<br>p=0.099   | -1.81<br>(SE=1.13)<br>95%CI(-<br>4.032, 0.413),<br>t=-1.601,<br>p=0.11    | 1.643<br>(SE=0.641)<br>95%CI(0.383,<br>2.903),<br>t=2.564,<br>p=0.011           | 1.721<br>(SE=0.714)<br>95%CI(0.318,<br>3.125),<br>t=2.412,<br>p=0.016            | 1.333<br>(SE=0.4)<br>95%CI(0.546,<br>2.121), t=3.33,<br>p=0.001          | 0 (SE=0.025)<br>95%CI(-0.05,<br>0.05), t=0,<br>p=>0.999                  | -11.4<br>(SE=2.316)<br>95%CI(-<br>16.007, -<br>6.793), t=-<br>4.923,<br>p=<0.001  | -0.8<br>(SE=1.04)<br>95%CI(-<br>2.869, 1.269),<br>t=-0.769,<br>p=0.444         | 0.9<br>(SE=1.032)<br>95%CI(-<br>1.154, 2.954),<br>t=0.872,<br>p=0.386              | 5.6 (SE=0.725)<br>95%CI(4.157,<br>7.043), t=7.724,<br>p=<0.001         |

|        |                                                                       |                                                                           |                                                                             |                                                                         |                                                                           |                                                                                  |                                                                                 |                                                                          |                                                                  |                                                                                  |                                                                               |                                                                           |                                                                        |
|--------|-----------------------------------------------------------------------|---------------------------------------------------------------------------|-----------------------------------------------------------------------------|-------------------------------------------------------------------------|---------------------------------------------------------------------------|----------------------------------------------------------------------------------|---------------------------------------------------------------------------------|--------------------------------------------------------------------------|------------------------------------------------------------------|----------------------------------------------------------------------------------|-------------------------------------------------------------------------------|---------------------------------------------------------------------------|------------------------------------------------------------------------|
| T6-T8  | 0.917<br>(SE=0.1)<br>95%CI(0.719,<br>1.114),<br>t=9.14,<br>p=<0.001   | -0.119<br>(SE=0.094)<br>95%CI(-<br>0.304, 0.065),<br>t=-1.269,<br>p=0.205 | -0.143<br>(SE=0.075)<br>95%CI(-0.29,<br>0.004), t=-<br>1.913,<br>p=0.057    | 0.51<br>(SE=0.294)<br>95%CI(-<br>0.069, 1.088),<br>t=1.733,<br>p=0.084  | -2 (SE=1.13)<br>95%CI(-<br>4.223, 0.223),<br>t=-1.769,<br>p=0.078         | 1.545<br>(SE=0.641)<br>95%CI(0.285,<br>2.805),<br>t=2.412,<br>p=0.016            | 0.976<br>(SE=0.714)<br>95%CI(-<br>0.427, 2.38),<br>t=1.368,<br>p=0.172          | 0.333<br>(SE=0.4)<br>95%CI(-<br>0.454, 1.121),<br>t=0.833,<br>p=0.406    | 0.03<br>(SE=0.025)<br>95%CI(-0.02,<br>0.08), t=1.188,<br>p=0.238 | -13.9<br>(SE=2.316)<br>95%CI(-<br>18.507, -<br>9.293), t=-<br>6.003,<br>p=<0.001 | 1.3 (SE=1.04)<br>95%CI(-<br>0.769, 3.369),<br>t=1.25,<br>p=0.215              | 2.9<br>(SE=1.032)<br>95%CI(0.846,<br>4.954),<br>t=2.809,<br>p=0.006       | 1.4 (SE=0.725)<br>95%CI(-0.043,<br>2.843), t=1.931,<br>p=0.057         |
| T6-T9  | 1.194<br>(SE=0.1)<br>95%CI(0.997,<br>1.392),<br>t=11.909,<br>p=<0.001 | -0.119<br>(SE=0.094)<br>95%CI(-<br>0.304, 0.065),<br>t=-1.269,<br>p=0.205 | -0.214<br>(SE=0.075)<br>95%CI(-<br>0.361, -<br>0.067), t=-<br>2.87, p=0.004 | 0.538<br>(SE=0.294)<br>95%CI(-0.04,<br>1.116),<br>t=1.83,<br>p=0.068    | -2.548<br>(SE=1.13)<br>95%CI(-<br>4.771, -0.325),<br>t=-2.254,<br>p=0.025 | -0.81<br>(SE=0.641)<br>95%CI(-2.07,<br>0.45), t=-<br>1.263,<br>p=0.207           | -0.462<br>(SE=0.714)<br>95%CI(-<br>1.865, 0.942),<br>t=-0.647,<br>p=0.518       | 0.167<br>(SE=0.4)<br>95%CI(-<br>0.621, 0.954),<br>t=0.416,<br>p=0.677    | 0.14<br>(SE=0.025)<br>95%CI(0.09,<br>0.19), t=5.546,<br>p=<0.001 | -10 (SE=2.316)<br>95%CI(-<br>14.607, -<br>5.393), t=-<br>4.319,<br>p=<0.001      | -4.1<br>(SE=1.04)<br>95%CI(-<br>6.169, -<br>2.031), t=-<br>3.943,<br>p=<0.001 | -5 (SE=1.032)<br>95%CI(-<br>7.054, -2.946),<br>t=-4.843,<br>p=<0.001      | 0.7 (SE=0.725)<br>95%CI(-0.743,<br>2.143), t=0.965,<br>p=0.337         |
| T7-T10 | 0.944<br>(SE=0.1)<br>95%CI(0.747,<br>1.142),<br>t=9.417,<br>p=<0.001  | -0.048<br>(SE=0.094)<br>95%CI(-<br>0.232, 0.137),<br>t=-0.508,<br>p=0.612 | -0.143<br>(SE=0.075)<br>95%CI(-0.29,<br>0.004), t=-<br>1.913,<br>p=0.057    | 0.057<br>(SE=0.294)<br>95%CI(-<br>0.521, 0.635),<br>t=0.194,<br>p=0.846 | -0.786<br>(SE=1.13)<br>95%CI(-<br>3.009, 1.437),<br>t=-0.695,<br>p=0.487  | -1.786<br>(SE=0.641)<br>95%CI(-<br>3.046, -<br>0.526), t=-<br>2.787,<br>p=0.006  | -2.436<br>(SE=0.714)<br>95%CI(-<br>3.839, -<br>1.032), t=-<br>3.413,<br>p=0.001 | -1.167<br>(SE=0.4)<br>95%CI(-<br>1.954, -0.379),<br>t=-2.914,<br>p=0.004 | 0.14<br>(SE=0.025)<br>95%CI(0.09,<br>0.19), t=5.546,<br>p=<0.001 | -0.8<br>(SE=2.316)<br>95%CI(-5.407,<br>3.807), t=-<br>0.345, p=0.731             | -4 (SE=1.04)<br>95%CI(-<br>6.069, -<br>1.931), t=-<br>3.846,<br>p=<0.001      | -5.6<br>(SE=1.032)<br>95%CI(-<br>7.654, -3.546),<br>t=-5.424,<br>p=<0.001 | -4.9 (SE=0.725)<br>95%CI(-6.343,<br>-3.457), t=-<br>6.758,<br>p=<0.001 |
| T7-T8  | 0.583<br>(SE=0.1)<br>95%CI(0.386,<br>0.781),<br>t=5.816,<br>p=<0.001  | -0.119<br>(SE=0.094)<br>95%CI(-<br>0.304, 0.065),<br>t=-1.269,<br>p=0.205 | -0.048<br>(SE=0.075)<br>95%CI(-<br>0.194, 0.099),<br>t=-0.638,<br>p=0.524   | 0.024<br>(SE=0.294)<br>95%CI(-<br>0.554, 0.602),<br>t=0.081,<br>p=0.936 | -0.19<br>(SE=1.13)<br>95%CI(-<br>2.413, 2.032),<br>t=-0.168,<br>p=0.866   | -0.098<br>(SE=0.641)<br>95%CI(-<br>1.358, 1.162),<br>t=-0.152,<br>p=0.879        | -0.745<br>(SE=0.714)<br>95%CI(-<br>2.149, 0.658),<br>t=-1.044,<br>p=0.297       | -1 (SE=0.4)<br>95%CI(-<br>1.787, -0.213),<br>t=-2.498,<br>p=0.013        | 0.03<br>(SE=0.025)<br>95%CI(-0.02,<br>0.08), t=1.188,<br>p=0.238 | -2.5<br>(SE=2.316)<br>95%CI(-7.107,<br>2.107), t=-<br>1.08, p=0.283              | 2.1 (SE=1.04)<br>95%CI(0.031,<br>4.169),<br>t=2.019,<br>p=0.047               | 2 (SE=1.032)<br>95%CI(-<br>0.054, 4.054),<br>t=1.937,<br>p=0.056          | -4.2 (SE=0.725)<br>95%CI(-5.643,<br>-2.757), t=-<br>5.793,<br>p=<0.001 |
| T7-T9  | 0.861<br>(SE=0.1)<br>95%CI(0.664,<br>1.058),<br>t=8.586,<br>p=<0.001  | -0.119<br>(SE=0.094)<br>95%CI(-<br>0.304, 0.065),<br>t=-1.269,<br>p=0.205 | -0.119<br>(SE=0.075)<br>95%CI(-<br>0.266, 0.028),<br>t=-1.594,<br>p=0.112   | 0.052<br>(SE=0.294)<br>95%CI(-<br>0.526, 0.631),<br>t=0.178,<br>p=0.859 | -0.738<br>(SE=1.13)<br>95%CI(-<br>2.961, 1.485),<br>t=-0.653,<br>p=0.514  | -2.452<br>(SE=0.641)<br>95%CI(-<br>3.712, -<br>1.192), t=-<br>3.827,<br>p=<0.001 | -2.183<br>(SE=0.714)<br>95%CI(-<br>3.587, -0.78),<br>t=-3.059,<br>p=0.002       | -1.167<br>(SE=0.4)<br>95%CI(-<br>1.954, -0.379),<br>t=-2.914,<br>p=0.004 | 0.14<br>(SE=0.025)<br>95%CI(0.09,<br>0.19), t=5.546,<br>p=<0.001 | 1.4 (SE=2.316)<br>95%CI(-3.207,<br>6.007),<br>t=0.605,<br>p=0.547                | -3.3<br>(SE=1.04)<br>95%CI(-<br>5.369, -<br>1.231), t=-<br>3.173,<br>p=0.002  | -5.9<br>(SE=1.032)<br>95%CI(-<br>7.954, -3.846),<br>t=-5.714,<br>p=<0.001 | -4.9 (SE=0.725)<br>95%CI(-6.343,<br>-3.457), t=-<br>6.758,<br>p=<0.001 |
| T8-T10 | 0.361<br>(SE=0.1)<br>95%CI(0.164,<br>0.558),<br>t=3.601,<br>p=<0.001  | 0.071<br>(SE=0.094)<br>95%CI(-<br>0.113, 0.256),<br>t=0.761,<br>p=0.447   | -0.095<br>(SE=0.075)<br>95%CI(-<br>0.242, 0.052),<br>t=-1.275,<br>p=0.203   | 0.033<br>(SE=0.294)<br>95%CI(-<br>0.545, 0.611),<br>t=0.113,<br>p=0.91  | -0.595<br>(SE=1.13)<br>95%CI(-<br>2.818, 1.628),<br>t=-0.527,<br>p=0.599  | -1.688<br>(SE=0.641)<br>95%CI(-<br>2.948, -<br>0.428), t=-<br>2.635,<br>p=0.009  | -1.69<br>(SE=0.714)<br>95%CI(-<br>3.094, -<br>0.287), t=-<br>2.369,<br>p=0.018  | -0.167<br>(SE=0.4)<br>95%CI(-<br>0.954, 0.621),<br>t=-0.416,<br>p=0.677  | 0.11<br>(SE=0.025)<br>95%CI(0.06,<br>0.16), t=4.357,<br>p=<0.001 | 1.7 (SE=2.316)<br>95%CI(-2.907,<br>6.307),<br>t=0.734,<br>p=0.465                | -6.1<br>(SE=1.04)<br>95%CI(-<br>8.169, -<br>4.031), t=-<br>5.866,<br>p=<0.001 | -7.6<br>(SE=1.032)<br>95%CI(-<br>9.654, -5.546),<br>t=-7.361,<br>p=<0.001 | -0.7 (SE=0.725)<br>95%CI(-2.143,<br>0.743), t=-<br>0.965, p=0.337      |
| T8-T9  | 0.278<br>(SE=0.1)<br>95%CI(0.08,<br>0.475),<br>t=2.77,<br>p=0.006     | 0 (SE=0.094)<br>95%CI(-<br>0.184, 0.184),<br>t=0, p=>0.999                | -0.071<br>(SE=0.075)<br>95%CI(-<br>0.218, 0.075),<br>t=-0.957,<br>p=0.339   | 0.029<br>(SE=0.294)<br>95%CI(-0.55,<br>0.607),<br>t=0.097,<br>p=0.923   | -0.548<br>(SE=1.13)<br>95%CI(-<br>2.771, 1.675),<br>t=-0.484,<br>p=0.628  | -2.355<br>(SE=0.641)<br>95%CI(-<br>3.615, -<br>1.095), t=-<br>3.675,<br>p=<0.001 | -1.438<br>(SE=0.714)<br>95%CI(-<br>2.842, -<br>0.035), t=-<br>2.015,<br>p=0.045 | -0.167<br>(SE=0.4)<br>95%CI(-<br>0.954, 0.621),<br>t=-0.416,<br>p=0.677  | 0.11<br>(SE=0.025)<br>95%CI(0.06,<br>0.16), t=4.357,<br>p=<0.001 | 3.9 (SE=2.316)<br>95%CI(-0.707,<br>8.507),<br>t=1.684,<br>p=0.096                | -5.4<br>(SE=1.04)<br>95%CI(-<br>7.469, -<br>3.331), t=-<br>5.193,<br>p=<0.001 | -7.9<br>(SE=1.032)<br>95%CI(-<br>9.954, -5.846),<br>t=-7.652,<br>p=<0.001 | -0.7 (SE=0.725)<br>95%CI(-2.143,<br>0.743), t=-<br>0.965, p=0.337      |
| T9-T10 | 0.083<br>(SE=0.1)<br>95%CI(-<br>0.114, 0.281),<br>t=0.831,<br>p=0.407 | 0.071<br>(SE=0.094)<br>95%CI(-<br>0.113, 0.256),<br>t=0.761,<br>p=0.447   | -0.024<br>(SE=0.075)<br>95%CI(-<br>0.171, 0.123),<br>t=-0.319,<br>p=0.75    | 0.005<br>(SE=0.294)<br>95%CI(-<br>0.573, 0.583),<br>t=0.016,<br>p=0.987 | -0.048<br>(SE=1.13)<br>95%CI(-<br>2.271, 2.175),<br>t=-0.042,<br>p=0.966  | 0.667<br>(SE=0.641)<br>95%CI(-<br>0.593, 1.927),<br>t=1.04,<br>p=0.299           | -0.252<br>(SE=0.714)<br>95%CI(-<br>1.656, 1.151),<br>t=-0.354,<br>p=0.724       | 0 (SE=0.4)<br>95%CI(-<br>0.787, 0.787),<br>t=0, p=>0.999                 | 0 (SE=0.025)<br>95%CI(-0.05,<br>0.05), t=0,<br>p=>0.999          | -2.2<br>(SE=2.316)<br>95%CI(-6.807,<br>2.407), t=-<br>0.95, p=0.345              | -0.7<br>(SE=1.04)<br>95%CI(-<br>2.769, 1.369),<br>t=-0.673,<br>p=0.503        | 0.3<br>(SE=1.032)<br>95%CI(-<br>1.754, 2.354),<br>t=0.291,<br>p=0.772     | 0 (SE=0.725)<br>95%CI(-1.443,<br>1.443), t=0,<br>p=>0.999              |

(SE): model coefficient (standard error); 95%CI: 95% confidence interval; t: Significant if p<0.05 (shown in red).

**Supplementary material. Table 4:** Radiofrequency parameters between both legs model coefficient terms results.

|                 | Frequency (Hz)                                                  | Maximum power (Watts)                                              | Average power (Watts)                                            | Absorbed energy (Volt-ampere)                                    | Temperature (Celsius)                                             |
|-----------------|-----------------------------------------------------------------|--------------------------------------------------------------------|------------------------------------------------------------------|------------------------------------------------------------------|-------------------------------------------------------------------|
| (Intercept)     | 1.17 (SE=0.113)<br>95%CI(0.938, 1.405),<br>t=10.373, p=<0.001   | 11.224 (SE=1.877)<br>95%CI(7.745, 14.74),<br>t=5.98, p=<0.001      | 6.137 (SE=0.539)<br>95%CI(5.109, 7.302),<br>t=11.384, p=<0.001   | 4.956 (SE=0.857)<br>95%CI(3.598, 6.409),<br>t=5.781, p=<0.001    | 35.203 (SE=1.632)<br>95%CI(31.342, 39.169),<br>t=21.566, p=<0.001 |
| Group (left)    | -0.14 (SE=0.25)<br>95%CI(-0.72, 0.542),<br>t=-0.558, p=0.577    | 0.756 (SE=1.863) 95%CI(-<br>3.151, 4.054), t=0.406,<br>p=0.685     | 1.654 (SE=1.011)<br>95%CI(-0.337, 3.719),<br>t=1.635, p=0.103    | -1.766 (SE=1.149)<br>95%CI(-3.971, 0.343),<br>t=-1.536, p=0.125  | -3.354 (SE=0.575)<br>95%CI(-4.378, -2.022),<br>t=-5.834, p=<0.001 |
| Group (left):T3 | 0.146 (SE=0.351)<br>95%CI(-0.595, 1.035),<br>t=0.415, p=0.679   | -3.45 (SE=2.56) 95%CI(-<br>8.937, 1.134), t=-1.347,<br>p=0.179     | -2.298 (SE=1.417)<br>95%CI(-4.996, 0.52),<br>t=-1.621, p=0.106   | -0.971 (SE=1.582)<br>95%CI(-4.35, 2.346), t=-<br>0.614, p=0.539  | 4.21 (SE=0.793)<br>95%CI(2.496, 5.643),<br>t=5.308, p=<0.001      |
| Group (left):T4 | 0.044 (SE=0.351)<br>95%CI(-0.798, 0.642),<br>t=0.125, p=0.901   | 6.531 (SE=2.56)<br>95%CI(2.01, 12.568),<br>t=2.551, p=0.011        | -1.374 (SE=1.417)<br>95%CI(-4.154, 1.334),<br>t=-0.969, p=0.333  | 0.307 (SE=1.582)<br>95%CI(-2.347, 2.65),<br>t=0.194, p=0.846     | 0.586 (SE=0.793)<br>95%CI(-1.33, 1.931),<br>t=0.739, p=0.461      |
| Group (left):T5 | 0.015 (SE=0.351)<br>95%CI(-0.806, 0.87),<br>t=0.043, p=0.965    | -10.179 (SE=2.56)<br>95%CI(-15.117, -4.452),<br>t=-3.975, p=<0.001 | -5.855 (SE=1.417)<br>95%CI(-8.806, -3.038),<br>t=-4.13, p=<0.001 | -3.662 (SE=1.582)<br>95%CI(-7.101, -0.494),<br>t=-2.315, p=0.021 | 4.248 (SE=0.793)<br>95%CI(2.361, 5.907),<br>t=5.356, p=<0.001     |
| Group (left):T6 | -0.354 (SE=0.351)<br>95%CI(-0.989, 0.331),<br>t=-1.009, p=0.314 | -8.293 (SE=2.56) 95%CI(-<br>13.103, -3.456), t=-3.239,<br>p=0.001  | -2.269 (SE=1.417)<br>95%CI(-4.935, 0.043),<br>t=-1.601, p=0.11   | 1.948 (SE=1.582)<br>95%CI(-1.052, 4.921),<br>t=1.231, p=0.219    | 4.905 (SE=0.793)<br>95%CI(3.282, 6.386),<br>t=6.185, p=<0.001     |
| Group (left):T7 | 0.131 (SE=0.351)<br>95%CI(-0.58, 0.964),<br>t=0.374, p=0.708    | 1.298 (SE=2.56) 95%CI(-<br>4.499, 6.447), t=0.507,<br>p=0.613      | 0.174 (SE=1.417)<br>95%CI(-2.653, 2.88),<br>t=0.123, p=0.902     | 2.769 (SE=1.582)<br>95%CI(-0.393, 5.685),<br>t=1.751, p=0.081    | 0.638 (SE=0.793)<br>95%CI(-0.929, 2.252),<br>t=0.805, p=0.421     |
| Group (left):T8 | 0.125 (SE=0.351)<br>95%CI(-0.752, 0.745),<br>t=0.357, p=0.722   | 3.607 (SE=2.56) 95%CI(-<br>1.145, 8.933), t=1.409,<br>p=0.16       | -2.024 (SE=1.417)<br>95%CI(-4.909, 0.523),<br>t=-1.428, p=0.154  | 0.024 (SE=1.582)<br>95%CI(-2.994, 2.921),<br>t=0.015, p=0.988    | 3.838 (SE=0.793)<br>95%CI(1.884, 5.743),<br>t=4.84, p=<0.001      |
| Group (left):T9 | 0.044 (SE=0.351)<br>95%CI(-0.69, 0.896),<br>t=0.125, p=0.901    | -0.84 (SE=2.56) 95%CI(-<br>5.655, 4.569), t=-0.328,<br>p=0.743     | 1.021 (SE=1.417)<br>95%CI(-1.897, 3.568),<br>t=0.721, p=0.472    | 6.486 (SE=1.582)<br>95%CI(3.242, 10.612),<br>t=4.101, p=<0.001   | 4.371 (SE=0.793)<br>95%CI(2.012, 6.036),<br>t=5.513, p=<0.001     |



|                  |                                                              |                                                               |                                                               |                                                               |                                                               |
|------------------|--------------------------------------------------------------|---------------------------------------------------------------|---------------------------------------------------------------|---------------------------------------------------------------|---------------------------------------------------------------|
| Group (left):T10 | 0.049 (SE=0.351)<br>95%CI(-0.795, 0.773),<br>t=0.138, p=0.89 | 1.312 (SE=2.56) 95%CI(-<br>4.447, 6.455), t=0.512,<br>p=0.609 | 2.388 (SE=1.417)<br>95%CI(-0.308, 4.886),<br>t=1.685, p=0.093 | 5.933 (SE=1.582)<br>95%CI(2.455, 8.734),<br>t=3.752, p=<0.001 | 4.371 (SE=0.793)<br>95%CI(2.581, 5.543),<br>t=5.513, p=<0.001 |
|------------------|--------------------------------------------------------------|---------------------------------------------------------------|---------------------------------------------------------------|---------------------------------------------------------------|---------------------------------------------------------------|

Group (left): Result comparing left leg against right leg as reference. (SE): model coefficient (standard error); 95%CI: 95% confidence interval; t: Significant if p<0.05 (shown in red).

**Supplementary material. Table 5:** Radiofrequency parameters between both legs model pairwise results.

|                     | Frequency (Hz)                                          | Maximum power (Watts)                                       | Average power (Watts)                                      | Absorbed energy (Volt-ampere)                             | Temperature (Celsius)                                      |
|---------------------|---------------------------------------------------------|-------------------------------------------------------------|------------------------------------------------------------|-----------------------------------------------------------|------------------------------------------------------------|
| Right-T2 vs Left-T2 | 0.14 (SE=0.25) 95%CI(-0.766, 1.045), t=0.558, p=>0.999  | -0.756 (SE=1.863) 95%CI(-7.506, 5.994), t=-0.406, p=>0.999  | -1.654 (SE=1.011) 95%CI(-5.315, 2.008), t=-1.635, p=>0.999 | 1.766 (SE=1.149) 95%CI(-2.398, 5.93), t=1.536, p=>0.999   | 3.354 (SE=0.575) 95%CI(1.271, 5.437), t=5.834, p=<0.001    |
| Right-T3 vs Left-T3 | -0.006 (SE=0.25) 95%CI(-0.912, 0.9), t=-0.024, p=>0.999 | 2.694 (SE=1.863) 95%CI(-4.056, 9.444), t=1.446, p=>0.999    | 0.644 (SE=1.011) 95%CI(-3.018, 4.306), t=0.637, p=>0.999   | 2.737 (SE=1.149) 95%CI(-1.427, 6.901), t=2.382, p=>0.999  | -0.855 (SE=0.575) 95%CI(-2.938, 1.228), t=-1.488, p=>0.999 |
| Right-T4 vs Left-T4 | 0.096 (SE=0.25) 95%CI(-0.81, 1.002), t=0.383, p=>0.999  | -7.287 (SE=1.863) 95%CI(-14.037, -0.537), t=-3.911, p=0.016 | -0.28 (SE=1.011) 95%CI(-3.941, 3.382), t=-0.277, p=>0.999  | 1.458 (SE=1.149) 95%CI(-2.705, 5.622), t=1.269, p=>0.999  | 2.768 (SE=0.575) 95%CI(0.685, 4.851), t=4.815, p=<0.001    |
| Right-T5 vs Left-T5 | 0.124 (SE=0.25) 95%CI(-0.781, 1.03), t=0.497, p=>0.999  | 9.423 (SE=1.863) 95%CI(2.673, 16.173), t=5.058, p=<0.001    | 4.201 (SE=1.011) 95%CI(0.54, 7.863), t=4.155, p=0.006      | 5.428 (SE=1.149) 95%CI(1.264, 9.591), t=4.723, p=<0.001   | -0.893 (SE=0.575) 95%CI(-2.976, 1.19), t=-1.554, p=>0.999  |
| Right-T6 vs Left-T6 | 0.494 (SE=0.25) 95%CI(-0.412, 1.4), t=1.975, p=>0.999   | 7.537 (SE=1.863) 95%CI(0.787, 14.287), t=4.046, p=0.01      | 0.616 (SE=1.011) 95%CI(-3.046, 4.277), t=0.609, p=>0.999   | -0.182 (SE=1.149) 95%CI(-4.346, 3.982), t=0.158, p=>0.999 | -1.551 (SE=0.575) 95%CI(-3.634, 0.532), t=-2.697, p=>0.999 |
| Right-T7 vs Left-T7 | 0.008 (SE=0.25) 95%CI(-0.898, 0.914), t=0.033, p=>0.999 | -2.053 (SE=1.863) 95%CI(-8.804, 4.697), t=-1.102, p=>0.999  | -1.827 (SE=1.011) 95%CI(-5.489, 1.834), t=-1.807, p=>0.999 | -1.003 (SE=1.149) 95%CI(-5.167, 3.16), t=0.873, p=>0.999  | 2.716 (SE=0.575) 95%CI(0.633, 4.799), t=4.724, p=<0.001    |
| Right-T8 vs Left-T8 | 0.014 (SE=0.25) 95%CI(-0.891, 0.92), t=0.057, p=>0.999  | -4.363 (SE=1.863) 95%CI(-11.113, 2.387), t=-2.342, p=>0.999 | 0.37 (SE=1.011) 95%CI(-3.291, 4.032), t=0.366, p=>0.999    | 1.742 (SE=1.149) 95%CI(-2.422, 5.906), t=1.516, p=>0.999  | -0.484 (SE=0.575) 95%CI(-2.567, 1.599), t=-0.842, p=>0.999 |

|                          |                                                               |                                                                 |                                                                         |                                                                           |                                                                 |
|--------------------------|---------------------------------------------------------------|-----------------------------------------------------------------|-------------------------------------------------------------------------|---------------------------------------------------------------------------|-----------------------------------------------------------------|
| Right-T9 vs<br>Left-T9   | 0.096 (SE=0.25)<br>95%CI(-0.81, 1.002),<br>t=0.383, p=>0.999  | 0.085 (SE=1.863)<br>95%CI(-6.666, 6.835),<br>t=0.045, p=>0.999  | -2.675 (SE=1.011)<br>95%CI(-6.337, 0.987),<br>t=-2.646, p=>0.999        | -4.72 (SE=1.149) 95%CI(-<br>8.884, -0.556), t=-4.107,<br>p= <b>0.007</b>  | -1.017 (SE=0.575)<br>95%CI(-3.1, 1.066), t=-<br>1.769, p=>0.999 |
| Right-T10 vs<br>Left-T10 | 0.091 (SE=0.25)<br>95%CI(-0.815, 0.997),<br>t=0.364, p=>0.999 | -2.068 (SE=1.863)<br>95%CI(-8.818, 4.683),<br>t=-1.11, p=>0.999 | -4.042 (SE=1.011)<br>95%CI(-7.703, -0.38),<br>t=-3.998, p= <b>0.011</b> | -4.168 (SE=1.149)<br>95%CI(-8.332, -0.004), t=-<br>3.626, p= <b>0.049</b> | -1.017 (SE=0.575)<br>95%CI(-3.1, 1.066), t=-<br>1.769, p=>0.999 |

(SE): model coefficient (standard error); 95%CI: 95% confidence interval. Significant if p<0.05 (shown in red).
